# Supplementary material for: In silico design of metal-free hydrophosphate catalysts for hydrogenation of CO2 to formate
Source: Royal Society of Chemistry journal article supplement (doi:10.1039/d1cp04582b), 2022-01-01
Supplement: d1cp04582b1.pdf [file d1cp04582b1.pdf]

## SUPPORTING INFORMATION FOR

### In Silico Design of Metal-Free Hydrophosphate Catalysts for Hydrogenation of CO<sub>2</sub> to Formate

Hong-Lei Wang<sup>1</sup>, Yan-Liang Zhao<sup>1</sup>, Hui-Xuan Zhao<sup>1</sup>, Jun-Xia Yang<sup>1</sup>, Dong Zhai<sup>1</sup>, Lei Sun<sup>1,\*</sup>, Wei-Qiao Deng<sup>1,2,\*</sup>

<sup>1</sup> Institute of Molecular Sciences and Engineering, Institute of Frontier and Interdisciplinary Science, Shandong University, Qingdao 266237, China.

<sup>2</sup> State Key Laboratory of Molecular Reaction Dynamics, Dalian National Laboratory for Clean Energy, Dalian Institute of Chemical Physics, Chinese Academy of Sciences, Dalian 116023, China.

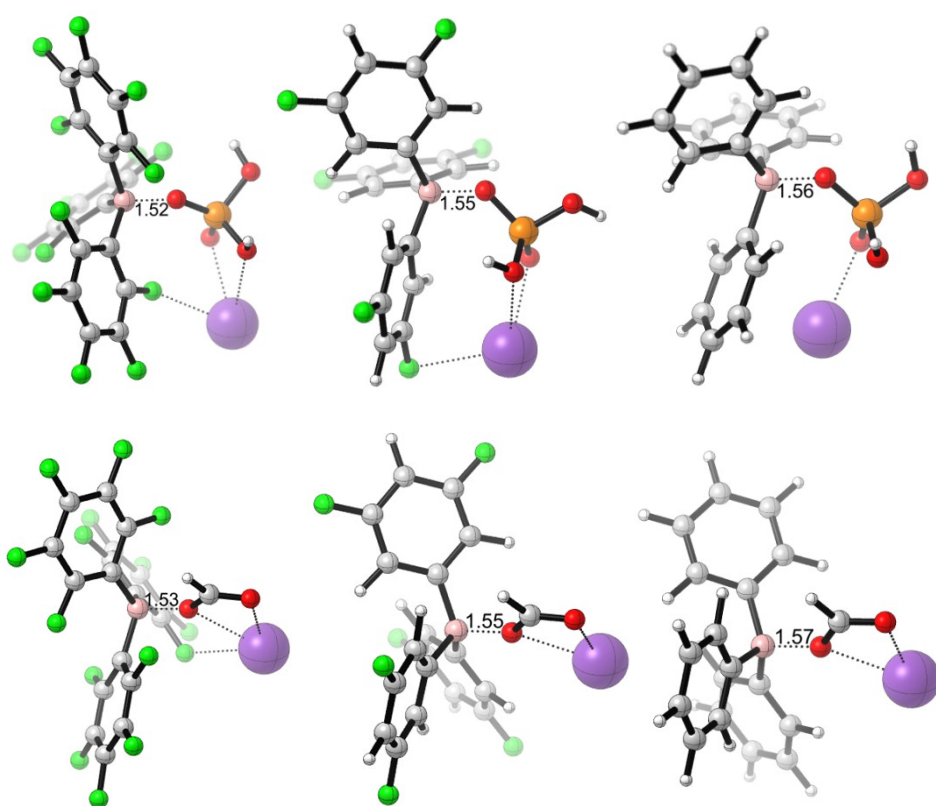

**Figure S1.** The optimized structure of, H: white. C: gray. O: red. B: pink. F: green.K: purple. Solvent is omitted for clarity.

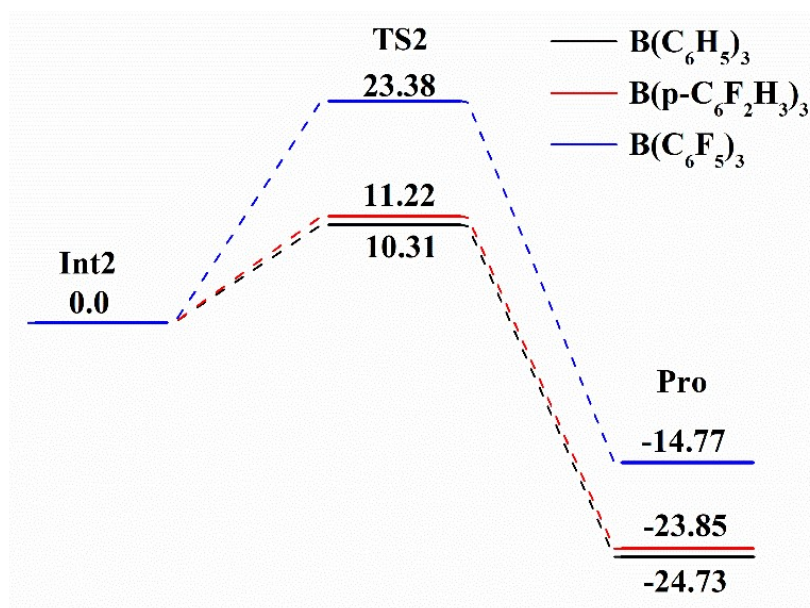

**Figure S2.** The real barrier height of TS2.

The real barrier height of TS2 can be calculated by subtracting the energy of Int2 from the energy of TS2. Thus, as Figure 2 shown, the real height of B(C<sub>6</sub>H<sub>5</sub>)<sub>3</sub>, B(p-C<sub>6</sub>F<sub>2</sub>H<sub>3</sub>)<sub>3</sub> and B(C<sub>6</sub>F<sub>5</sub>)<sub>3</sub> are 10.31, 11.22 and 23.38 kcal/mol, respectively.

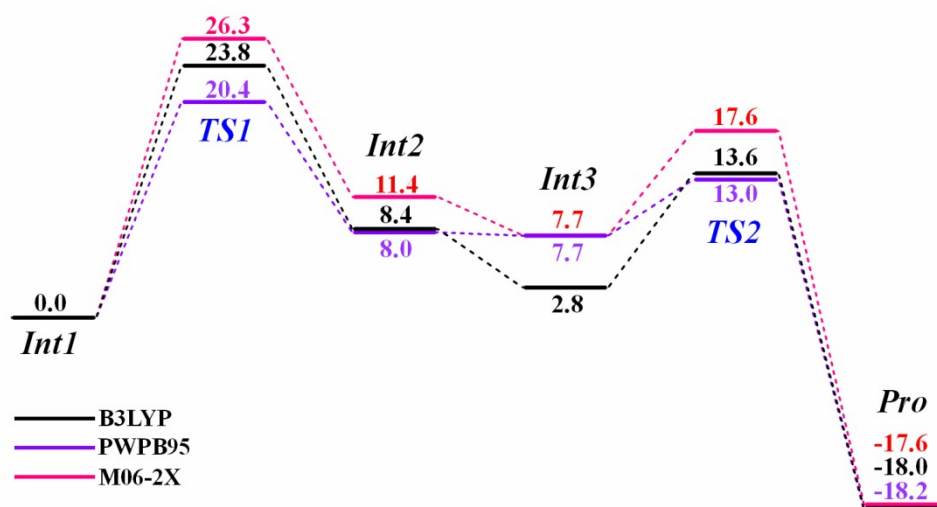

**Figure S3.** The energy profile (in kcal/mol, Lewis pair is B(C<sub>6</sub>H<sub>5</sub>)-KH<sub>2</sub>PO<sub>4</sub>) for the hydrogenation of CO<sub>2</sub>.

Besides the M06-2X that has been mentioned in our manuscript, B3LYP<sup>[1,2]</sup>-D3(BJ)/6-311g(d,p) and PWPB95<sup>[3]</sup>-D3<sup>[4]</sup>(BJ)/def2-TZVPP are calculated to prove the essential chemistry is not affected by the choice of functional. The calculation of B3LYP-D3(BJ) and PWPB95-D3(BJ) was performed by Gaussian and ORCA<sup>[5]</sup>, respectively. As Fig.S3 shown, the rate-determining step for three functionals is the step of TS1. Beside the B3LYP-D3(BJ), the profile calculated by M06-2X is also consistent with the result of the double hybrid

PWPB95-D3(BJ).

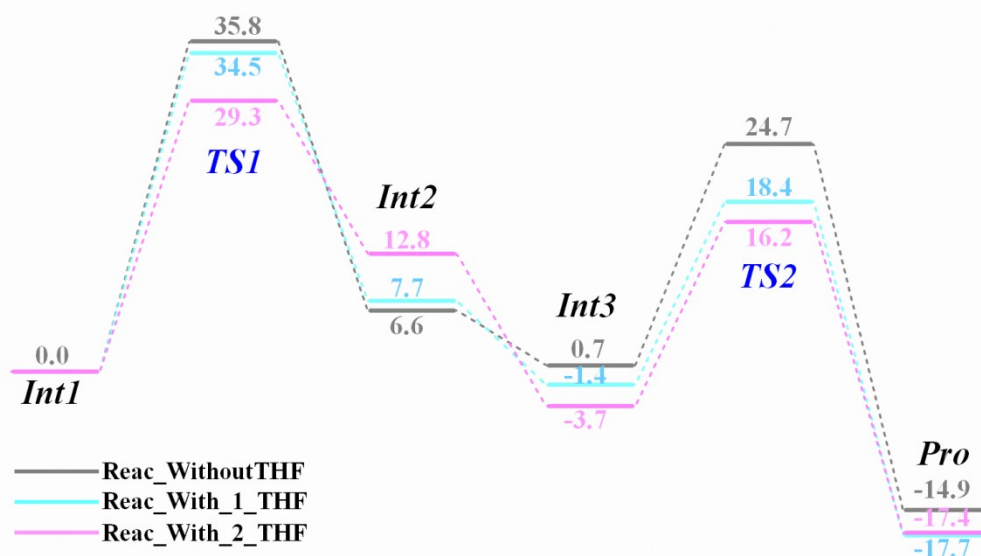

**Figure S4.** The energy profile (in kcal/mol, Lewis pair is  $B(C_6H_5)_3-KH_2PO_4$ ) for the hydrogenation of  $CO_2$ .

- [1] A. D. Becke *J. Chem. Phys.*, 1993, **98**, 5648 —5652  
[2] P. J. Stephens, F. J. Devlin, C. F. Chabalowski and M. J. Frisch, *J. Phys. Chem.*, 1994, **98**, 11623 —11627  
[3] L. Goerigk and S. Grimme, *J. Chem. Theory Comput.*, 2011, **7**, 291 —309  
[4] S. Grimme, J. Antony, S. Ehrlich and H. Krieg, *J. Chem. Phys.*, 2010, **132**, 154104  
[5] ORCA—an ab initio, density functional and semiempirical program package, V. 4.0.0, F. Neese, MPI für Chemische Energiekonversion, Mülheim A. D. Ruhr, Germany, 2017.

### Cartesians coordinates of the optimized structures

$K_2CO_3$ -BCF(M062x/6-311++G\*\*)

Reactant

|   |             |             |             |
|---|-------------|-------------|-------------|
| C | -3.28903500 | 1.44765700  | -1.39182300 |
| O | -3.73598400 | 2.00850100  | -0.37901000 |
| O | -3.59633400 | 0.35144100  | -1.91295200 |
| K | -4.09777200 | -2.02495100 | -1.85316400 |
| O | -2.26676300 | 2.15497600  | -2.01991500 |
| B | 0.66011600  | -0.18487000 | -0.62988300 |
| C | -0.62513400 | 0.09428200  | 0.37165100  |
| C | 1.86199200  | 0.92217500  | -0.51846500 |
| C | 1.13246400  | -1.70969200 | -0.29047300 |
| C | -0.78200300 | 1.03737300  | 1.38120000  |

|   |             |             |             |
|---|-------------|-------------|-------------|
| C | -1.90818200 | 1.14215000  | 2.19404500  |
| C | -2.96645900 | 0.26344000  | 2.03386400  |
| C | -2.85629000 | -0.70075500 | 1.04793400  |
| C | -1.72189400 | -0.75455800 | 0.25768000  |
| C | 1.54941700  | -2.06366200 | 0.98945800  |
| C | 1.89500700  | -3.35319500 | 1.36334200  |
| C | 1.81537900  | -4.37031400 | 0.41979000  |
| C | 1.39512600  | -4.07262900 | -0.86708500 |
| C | 1.06279800  | -2.76108900 | -1.19432800 |
| C | 3.20684300  | 0.68136400  | -0.24326000 |
| C | 4.18356900  | 1.67556900  | -0.21961400 |
| C | 3.83950500  | 2.99205300  | -0.47987300 |
| C | 2.51545600  | 3.28612700  | -0.77213700 |
| C | 1.59115000  | 2.25697800  | -0.79344600 |
| F | -1.73044900 | -1.72398200 | -0.69281700 |
| F | -3.87648800 | -1.55567900 | 0.81683800  |
| F | -4.06453700 | 0.36795700  | 2.77412600  |
| F | -2.00015100 | 2.14330600  | 3.08352900  |
| F | 0.16134400  | 1.98519000  | 1.60241400  |
| F | 0.63754700  | -2.55914300 | -2.45490900 |
| F | 2.13312500  | -5.62280500 | 0.75323100  |
| F | 2.29792700  | -3.63124300 | 2.60656400  |
| F | 1.64111400  | -1.10967800 | 1.93445500  |
| F | 0.31609400  | 2.62469600  | -1.09345100 |
| F | 3.65567000  | -0.55699800 | 0.01023300  |
| F | 2.13859000  | 4.54971500  | -1.01805100 |
| F | 4.75856200  | 3.95722000  | -0.45442400 |
| F | 5.45353600  | 1.36757400  | 0.04989900  |
| F | 1.29418600  | -5.05149700 | -1.77504700 |
| H | -1.86887800 | 1.58135200  | -2.68825100 |
| H | 0.22299400  | -0.13799400 | -1.75938200 |
| K | -1.77617000 | 3.63654600  | 0.12042700  |

TS1

|   |             |             |             |
|---|-------------|-------------|-------------|
| C | -2.93535400 | 0.13389200  | -1.71517500 |
| O | -3.75259200 | 0.72574900  | -0.91324400 |
| O | -2.94079600 | -1.14791400 | -1.82891100 |
| K | -2.89060700 | -3.47589100 | -1.79813800 |
| O | -2.07168000 | 0.83399700  | -2.38896200 |
| B | 0.69304800  | 0.01414500  | 0.31757300  |
| C | -0.76472200 | -0.15443100 | 0.87193600  |
| C | 1.38186300  | 1.44041100  | 0.22594200  |
| C | 1.63295800  | -1.24925700 | 0.13143000  |
| C | -1.43499900 | 0.82307600  | 1.61831500  |
| C | -2.74425000 | 0.69467800  | 2.04531900  |
| C | -3.45929200 | -0.45161700 | 1.72615700  |
| C | -2.82535100 | -1.46460000 | 1.03045600  |
| C | -1.51968900 | -1.30067700 | 0.61664600  |
| C | 1.61505200  | -2.34526500 | 0.99323400  |
| C | 2.45590600  | -3.43997000 | 0.84447500  |

|   |             |             |             |
|---|-------------|-------------|-------------|
| C | 3.36340900  | -3.46463900 | -0.20550100 |
| C | 3.42610400  | -2.39106500 | -1.08422700 |
| C | 2.57939700  | -1.30959800 | -0.89285500 |
| C | 2.70995000  | 1.65656800  | 0.59851400  |
| C | 3.33337800  | 2.89612200  | 0.52070600  |
| C | 2.62502400  | 3.98708000  | 0.03994100  |
| C | 1.30168600  | 3.82150500  | -0.34620600 |
| C | 0.71409800  | 2.57259700  | -0.23931900 |
| F | -0.99332800 | -2.33012600 | -0.07771500 |
| F | -3.48740100 | -2.59476200 | 0.72890000  |
| F | -4.72052800 | -0.58258100 | 2.10307900  |
| F | -3.33368800 | 1.67554500  | 2.73239400  |
| F | -0.80879300 | 1.95711900  | 1.97290300  |
| F | 2.70346300  | -0.29201800 | -1.75111200 |
| F | 4.17083800  | -4.50775300 | -0.36550600 |
| F | 2.39662200  | -4.46525100 | 1.69504400  |
| F | 0.77381200  | -2.37827800 | 2.03465100  |
| F | -0.56797800 | 2.48736400  | -0.61437300 |
| F | 3.45783800  | 0.65531200  | 1.07847500  |
| F | 0.60091500  | 4.86194400  | -0.80634700 |
| F | 3.20300400  | 5.17916800  | -0.04425800 |
| F | 4.60093800  | 3.04316500  | 0.90085600  |
| F | 4.30045100  | -2.40559500 | -2.08893500 |
| H | -0.47255800 | 0.18158500  | -1.91500500 |
| H | 0.20966700  | -0.10264300 | -1.65688300 |
| K | -3.02930400 | 3.00734100  | -1.62966500 |

Int1

|   |             |             |             |
|---|-------------|-------------|-------------|
| C | -3.34490900 | 1.17445700  | -1.73839500 |
| O | -3.03106400 | 2.33475500  | -1.45109000 |
| O | -4.36538900 | 0.51979800  | -1.46805200 |
| K | -4.39079500 | -1.93688300 | -1.39701100 |
| O | -2.36893300 | 0.46284500  | -2.53739700 |
| B | 0.43233700  | -0.02911500 | -0.38876300 |
| C | -0.88270100 | 0.44084500  | 0.47824900  |
| C | 1.76256300  | 0.88328100  | -0.11877800 |
| C | 0.88271500  | -1.57881600 | -0.13787400 |
| C | -1.05758600 | 1.66790900  | 1.11147700  |
| C | -2.20592700 | 2.04516500  | 1.79989500  |
| C | -3.28538300 | 1.17716600  | 1.85866000  |
| C | -3.17822300 | -0.04573400 | 1.21655300  |
| C | -2.00972500 | -0.36768400 | 0.55418200  |
| C | 0.59133700  | -2.37488200 | 0.96537200  |
| C | 1.05196900  | -3.67880800 | 1.11291500  |
| C | 1.85761900  | -4.23547300 | 0.13118500  |
| C | 2.19044000  | -3.47782400 | -0.98355600 |
| C | 1.70361800  | -2.18192500 | -1.08942800 |
| C | 2.36366900  | 0.89857500  | 1.13876900  |
| C | 3.55108600  | 1.55763200  | 1.41765600  |
| C | 4.19607200  | 2.25450000  | 0.40092000  |
| C | 3.63730100  | 2.27805500  | -0.86671900 |
| C | 2.44626500  | 1.59547600  | -1.09240000 |

|   |             |             |             |
|---|-------------|-------------|-------------|
| F | -2.03622100 | -1.55451100 | -0.12485000 |
| F | -4.22049000 | -0.89702400 | 1.18270300  |
| F | -4.40500600 | 1.51761000  | 2.48531400  |
| F | -2.28734500 | 3.24538100  | 2.36840600  |
| F | -0.10282600 | 2.62293500  | 1.01423300  |
| F | 2.07097900  | -1.48843300 | -2.18115100 |
| F | 2.30651200  | -5.48462300 | 0.25596200  |
| F | 0.72374800  | -4.40001500 | 2.18852200  |
| F | -0.18373100 | -1.91243000 | 1.96221300  |
| F | 1.94602200  | 1.68692700  | -2.35469900 |
| F | 1.77210100  | 0.24658700  | 2.15079900  |
| F | 4.23576200  | 2.95340400  | -1.85090200 |
| F | 5.33598200  | 2.89693800  | 0.64620700  |
| F | 4.08147800  | 1.53670000  | 2.63969900  |
| F | 2.96952300  | -4.00035000 | -1.93386100 |
| H | -1.75211600 | -0.01366600 | -1.96032000 |
| H | 0.14362600  | 0.05776400  | -1.57089400 |
| K | -0.55182100 | 2.60261800  | -1.96415200 |

## Int2

|   |             |             |             |
|---|-------------|-------------|-------------|
| C | -3.58070800 | -1.72606200 | -2.67152100 |
| O | -4.95292300 | -1.47320500 | -2.58136500 |
| O | -3.16930400 | -2.32186500 | -3.67438200 |
| K | -0.63601900 | -2.05806500 | -2.73796300 |
| O | -2.93757200 | -1.29132400 | -1.68364100 |
| B | 0.41522600  | 0.12456400  | -0.12000600 |
| C | 1.94524500  | 0.35695200  | -0.62464400 |
| C | 0.44719800  | -0.97279300 | 1.09427100  |
| C | -0.41295600 | 1.48260900  | 0.25525700  |
| C | 2.91970500  | 0.86340900  | 0.23183200  |
| C | 4.24771500  | 1.03594400  | -0.12663600 |
| C | 4.65488700  | 0.68041200  | -1.40789800 |
| C | 3.72671300  | 0.16187100  | -2.29704500 |
| C | 2.40803700  | 0.01192700  | -1.88401500 |
| C | -0.01191500 | 2.80421100  | 0.08537000  |
| C | -0.84460800 | 3.90211700  | 0.30307900  |
| C | -2.15949000 | 3.70692500  | 0.69590800  |
| C | -2.60248600 | 2.40581500  | 0.87741700  |
| C | -1.73154300 | 1.35189900  | 0.67187200  |
| C | 0.33157400  | -0.70324000 | 2.45479900  |
| C | 0.38612000  | -1.68493400 | 3.43897800  |
| C | 0.56975100  | -3.01158800 | 3.07687600  |
| C | 0.69332000  | -3.33450800 | 1.73274000  |
| C | 0.63098000  | -2.31665900 | 0.79316300  |
| F | 1.56239100  | -0.51417500 | -2.81359300 |
| F | 4.10452600  | -0.19315400 | -3.52921600 |
| F | 5.92614600  | 0.83454700  | -1.77576200 |
| F | 5.13772300  | 1.53424400  | 0.73281200  |
| F | 2.56566100  | 1.22568600  | 1.47422200  |
| F | -2.25514100 | 0.11620100  | 0.88879000  |
| F | -2.98379700 | 4.73744900  | 0.88155500  |
| F | -0.39525900 | 5.14233000  | 0.11247000  |
| F | 1.22740900  | 3.09998100  | -0.32992500 |
| F | 0.76211200  | -2.70260700 | -0.50630500 |
| F | 0.13537900  | 0.55243300  | 2.88717700  |
| F | 0.86489000  | -4.60689200 | 1.36159300  |

|   |             |             |             |
|---|-------------|-------------|-------------|
| F | 0.62387800  | -3.96551100 | 4.00633600  |
| F | 0.25723500  | -1.36535200 | 4.72837100  |
| F | -3.89131000 | 2.15959000  | 1.21807700  |
| H | -0.22885200 | -0.35906100 | -1.02025000 |
| K | -4.65298800 | -0.16894600 | -0.19436200 |
| H | -5.35959500 | -1.83817600 | -3.37869100 |

KHCO<sub>3</sub>-BCF(M062x/6-311++G\*\*)

Reactant

|   |             |             |             |
|---|-------------|-------------|-------------|
| C | -2.98558600 | -1.29871700 | 2.20295500  |
| O | -3.74316300 | -2.19022400 | 2.91520700  |
| O | -3.52688700 | -0.17881000 | 2.02070600  |
| K | -4.29817700 | 1.96414900  | 1.33917200  |
| O | -1.86840200 | -1.68531600 | 1.80734700  |
| B | 0.54584600  | -0.01304000 | -0.10115200 |
| C | -0.79313100 | -0.56088400 | -0.74611400 |
| C | 1.82672900  | -0.94516600 | 0.02233800  |
| C | 0.82816100  | 1.55775100  | -0.07660500 |
| C | -0.90639800 | -1.80504700 | -1.36680600 |
| C | -2.11709500 | -2.33536300 | -1.79595600 |
| C | -3.28506500 | -1.61040900 | -1.61527900 |
| C | -3.21434000 | -0.36002300 | -1.02136000 |
| C | -1.99393200 | 0.12968100  | -0.60555700 |
| C | 0.41559800  | 2.42770100  | -1.08320400 |
| C | 0.73202300  | 3.77980700  | -1.09094800 |
| C | 1.49340600  | 4.30908900  | -0.05790000 |
| C | 1.93257500  | 3.47966700  | 0.96569300  |
| C | 1.60332500  | 2.13239500  | 0.92969600  |
| C | 3.06354800  | -0.58158000 | -0.50758000 |
| C | 4.19159200  | -1.38672300 | -0.41649300 |
| C | 4.10483300  | -2.60634000 | 0.23872100  |
| C | 2.89296400  | -3.01002500 | 0.78569200  |
| C | 1.78527700  | -2.18590900 | 0.65995700  |
| F | -2.02024400 | 1.34480100  | -0.01155600 |
| F | -4.33221000 | 0.37157700  | -0.85199200 |
| F | -4.45220000 | -2.09383500 | -2.02164900 |
| F | -2.16279900 | -3.52666800 | -2.38574900 |
| F | 0.17223300  | -2.55856900 | -1.59451900 |
| F | 2.05718000  | 1.36896200  | 1.93282600  |
| F | 1.79467700  | 5.60300900  | -0.04569400 |
| F | 0.30848700  | 4.57206700  | -2.07589800 |
| F | -0.31234900 | 1.97982100  | -2.11510800 |
| F | 0.63632600  | -2.61584900 | 1.17871700  |
| F | 3.21350900  | 0.57826700  | -1.16604100 |
| F | 2.80647600  | -4.18282100 | 1.40945600  |
| F | 5.17429100  | -3.38759700 | 0.33761000  |

|   |             |             |             |
|---|-------------|-------------|-------------|
| F | 5.34816000  | -1.00109300 | -0.95381900 |
| F | 2.66333600  | 3.97954100  | 1.95970000  |
| H | -3.21031200 | -2.99326800 | 2.98316500  |
| H | -0.40713600 | -0.50918900 | 1.60975000  |
| H | 0.16046300  | 0.01969700  | 1.62842500  |

### TS1

|   |             |             |             |
|---|-------------|-------------|-------------|
| C | -2.98558600 | -1.29871700 | 2.20295500  |
| O | -3.74316300 | -2.19022400 | 2.91520700  |
| O | -3.52688700 | -0.17881000 | 2.02070600  |
| K | -4.29817700 | 1.96414800  | 1.33917200  |
| O | -1.86840200 | -1.68531600 | 1.80734700  |
| B | 0.54584600  | -0.01304000 | -0.10115200 |
| C | -0.79313100 | -0.56088400 | -0.74611400 |
| C | 1.82672900  | -0.94516600 | 0.02233800  |
| C | 0.82816100  | 1.55775100  | -0.07660500 |
| C | -0.90639800 | -1.80504700 | -1.36680600 |
| C | -2.11709500 | -2.33536300 | -1.79595600 |
| C | -3.28506500 | -1.61040900 | -1.61527900 |
| C | -3.21434000 | -0.36002300 | -1.02136000 |
| C | -1.99393200 | 0.12968100  | -0.60555700 |
| C | 0.41559800  | 2.42770100  | -1.08320400 |
| C | 0.73202300  | 3.77980700  | -1.09094800 |
| C | 1.49340500  | 4.30908900  | -0.05790000 |
| C | 1.93257500  | 3.47966700  | 0.96569300  |
| C | 1.60332500  | 2.13239500  | 0.92969600  |
| C | 3.06354800  | -0.58158000 | -0.50758000 |
| C | 4.19159200  | -1.38672200 | -0.41649300 |
| C | 4.10483300  | -2.60633900 | 0.23872100  |
| C | 2.89296400  | -3.01002500 | 0.78569200  |
| C | 1.78527700  | -2.18590900 | 0.65995700  |
| F | -2.02024400 | 1.34480100  | -0.01155600 |
| F | -4.33221000 | 0.37157600  | -0.85199200 |
| F | -4.45220000 | -2.09383600 | -2.02164900 |
| F | -2.16279900 | -3.52666800 | -2.38574900 |
| F | 0.17223300  | -2.55856900 | -1.59451900 |
| F | 2.05718000  | 1.36896200  | 1.93282600  |
| F | 1.79467600  | 5.60300900  | -0.04569400 |
| F | 0.30848600  | 4.57206700  | -2.07589800 |
| F | -0.31234900 | 1.97982100  | -2.11510800 |
| F | 0.63632600  | -2.61584900 | 1.17871700  |
| F | 3.21350900  | 0.57826700  | -1.16604100 |
| F | 2.80647700  | -4.18282100 | 1.40945600  |
| F | 5.17429100  | -3.38759600 | 0.33761000  |
| F | 5.34816000  | -1.00109200 | -0.95381900 |
| F | 2.66333600  | 3.97954100  | 1.95970000  |
| H | -3.21031200 | -2.99326800 | 2.98316500  |
| H | -0.40713600 | -0.50918900 | 1.60975000  |
| H | 0.16046300  | 0.01969700  | 1.62842500  |

### Int1

|   |             |             |             |
|---|-------------|-------------|-------------|
| C | -2.45425800 | -1.87240400 | 1.81947000  |
| O | -3.38171900 | -2.48885700 | 1.09360500  |
| O | -2.72323500 | -0.88227500 | 2.47261800  |
| K | -3.86796100 | 1.36082800  | 2.39981200  |
| O | -1.28165800 | -2.46356500 | 1.74706900  |
| B | 0.30663100  | 0.03596100  | 0.41779200  |
| C | -1.06022000 | -0.20531000 | -0.45624300 |
| C | 1.46727600  | -1.08387200 | 0.19263600  |



|   |             |             |             |
|---|-------------|-------------|-------------|
| C | 0.95110500  | 1.51277300  | 0.14913600  |
| C | -1.35160600 | -1.22530800 | -1.35905100 |
| C | -2.59144900 | -1.37896400 | -1.98127100 |
| C | -3.63015900 | -0.50785800 | -1.68897300 |
| C | -3.38915000 | 0.51609600  | -0.78655200 |
| C | -2.13151900 | 0.64513500  | -0.22525100 |
| C | 0.75689700  | 2.30051200  | -0.98008600 |
| C | 1.35090000  | 3.54509500  | -1.16125100 |
| C | 2.19238400  | 4.04803100  | -0.18066700 |
| C | 2.42447200  | 3.29811300  | 0.96423700  |
| C | 1.80775700  | 2.06125200  | 1.10107200  |
| C | 2.16511100  | -1.18417500 | -1.00824600 |
| C | 3.20563600  | -2.07546000 | -1.22224200 |
| C | 3.59377700  | -2.92372600 | -0.19128900 |
| C | 2.93517000  | -2.86166000 | 1.02679000  |
| C | 1.90005400  | -1.94795800 | 1.18669900  |
| F | -1.99177400 | 1.68327200  | 0.64920400  |
| F | -4.38517200 | 1.35125700  | -0.40495900 |
| F | -4.83302000 | -0.66192800 | -2.23907600 |
| F | -2.80229700 | -2.38631100 | -2.83032200 |
| F | -0.43839200 | -2.15484900 | -1.66685100 |
| F | 2.07569800  | 1.37787200  | 2.22764500  |
| F | 2.77268200  | 5.23950800  | -0.33420800 |
| F | 1.11935800  | 4.25827100  | -2.26735200 |
| F | -0.04644000 | 1.88403000  | -1.97684900 |
| F | 1.29758000  | -1.94917100 | 2.40489100  |
| F | 1.81517300  | -0.39163000 | -2.03375300 |
| F | 3.29746600  | -3.67338600 | 2.02398600  |
| F | 4.58760900  | -3.79295300 | -0.37423100 |
| F | 3.83370900  | -2.13416700 | -2.39800100 |
| F | 3.23186400  | 3.77402100  | 1.91722700  |
| H | -2.98358500 | -3.22613700 | 0.60563200  |
| H | -0.57675200 | -1.91785400 | 2.15193000  |
| H | -0.04813800 | 0.00964000  | 1.58104100  |

## Int2

|   |             |             |             |
|---|-------------|-------------|-------------|
| C | -4.05431600 | -1.41149800 | -2.60589200 |
| O | -4.97054700 | -1.71621300 | -3.51528300 |
| O | -2.87598500 | -1.63774800 | -2.78154800 |
| K | -0.35362800 | -1.91460000 | -3.04540400 |
| O | -4.58049300 | -0.85113200 | -1.52902300 |
| B | 0.16892900  | 0.09358100  | -0.21709400 |
| C | 1.70860700  | 0.48346800  | -0.58846200 |
| C | 0.20063500  | -1.09163500 | 0.91618400  |
| C | -0.78802300 | 1.34165300  | 0.21599300  |
| C | 2.61068800  | 0.89403500  | 0.39156900  |
| C | 3.94384400  | 1.18431200  | 0.14146500  |
| C | 4.43620500  | 1.05953400  | -1.15327500 |
| C | 3.58325800  | 0.64897400  | -2.16519100 |

|   |             |             |             |
|---|-------------|-------------|-------------|
| C | 2.25668900  | 0.37401200  | -1.85543500 |
| C | -0.43684700 | 2.67727400  | 0.38218700  |
| C | -1.34922400 | 3.67336500  | 0.72217700  |
| C | -2.68649100 | 3.35469800  | 0.90567400  |
| C | -3.08994400 | 2.03651200  | 0.74580900  |
| C | -2.13921800 | 1.08848600  | 0.41119000  |
| C | -0.00848400 | -0.92206900 | 2.28330700  |
| C | 0.05791900  | -1.96345100 | 3.20401000  |
| C | 0.34970600  | -3.24918100 | 2.77099200  |
| C | 0.56945800  | -3.47253300 | 1.41934000  |
| C | 0.49148800  | -2.39807500 | 0.54716100  |
| F | 1.49006600  | -0.03764000 | -2.90901100 |
| F | 4.03719000  | 0.51064600  | -3.41511600 |
| F | 5.71412500  | 1.32566800  | -1.41694900 |
| F | 4.75779000  | 1.57897900  | 1.12020900  |
| F | 2.18193800  | 1.03509100  | 1.65320300  |
| F | -2.60019400 | -0.19204900 | 0.27244300  |
| F | -3.57170800 | 4.29840000  | 1.22126300  |
| F | -0.95084100 | 4.93758500  | 0.86447200  |
| F | 0.83022100  | 3.08340600  | 0.20977600  |
| F | 0.72202200  | -2.69288400 | -0.76771300 |
| F | -0.29560300 | 0.28633800  | 2.78587900  |
| F | 0.84648500  | -4.70259700 | 0.97609400  |
| F | 0.41593200  | -4.25759600 | 3.63857400  |
| F | -0.15258200 | -1.73971700 | 4.50111800  |
| F | -4.37439300 | 1.69549200  | 0.89933900  |
| H | -5.84890500 | -1.45889900 | -3.19870200 |
| H | -0.36819700 | -0.36789000 | -1.20079400 |
| H | -3.88215400 | -0.63233100 | -0.88056800 |

$K_2H_2PO_4$ -BCF(M062x/6-311++G\*\*)

Reactant

|   |             |             |             |
|---|-------------|-------------|-------------|
| C | -0.86187200 | 3.89693800  | -0.27177800 |
| C | -0.50150800 | 2.57690900  | -0.06815700 |
| F | -3.70637100 | 1.08424000  | 0.59582600  |
| F | -4.43026700 | 3.61405100  | 0.22649800  |
| F | -2.57168900 | 5.51200800  | -0.35407400 |
| F | 0.05845200  | 4.82135400  | -0.53989400 |
| C | 0.36240200  | -0.23679200 | 1.28223600  |
| F | -1.40021700 | -2.28917400 | 2.14985200  |
| F | -3.15737000 | -4.22827900 | 1.65797300  |
| F | -4.68842000 | -4.16148400 | -0.58797700 |
| F | -4.43970400 | -2.10082600 | -2.34261400 |
| C | 0.88541500  | 0.62336800  | 2.24780600  |
| C | 2.07755000  | 0.37818400  | 2.91838200  |
| C | 2.80662600  | -0.76797800 | 2.62099200  |
| C | 2.31591200  | -1.65202400 | 1.67516400  |
| H | -0.29094000 | -0.02555900 | -1.35535500 |
| C | 1.11745200  | -1.38005000 | 1.04290100  |
| F | 0.24037700  | 1.74899800  | 2.58014600  |
| F | 2.52977200  | 1.23063700  | 3.83984100  |
| F | 3.95807700  | -1.00796400 | 3.23744500  |
| C | -3.03406200 | -3.22132900 | 0.79541000  |

|   |             |             |             |
|---|-------------|-------------|-------------|
| C | -3.68843900 | -2.13465400 | -1.24563700 |
| F | 3.01898700  | -2.74229900 | 1.33631200  |
| C | -2.77900100 | -1.12534800 | -0.97157900 |
| C | -1.96044300 | -1.11731700 | 0.16008900  |
| C | -3.81754400 | -3.18965300 | -0.34981400 |
| C | -2.12418300 | -2.19835100 | 1.02570600  |
| F | 0.70840200  | -2.28765200 | 0.14244200  |
| B | -0.94146500 | 0.06083600  | 0.43567500  |
| F | -2.69497700 | -0.12392900 | -1.85294100 |
| F | 0.81134700  | 2.29558500  | -0.15165100 |
| C | -1.40942900 | 1.55867200  | 0.21969600  |
| C | -2.74198900 | 1.96396000  | 0.30476800  |
| C | -3.14760100 | 3.28000500  | 0.11940500  |
| C | -2.20206100 | 4.25166700  | -0.17495300 |
| H | 0.45946100  | -0.11953800 | -1.23803500 |
| P | 2.99781600  | -0.06046800 | -2.54113800 |
| O | 2.48642200  | -0.40133800 | -1.08802100 |
| O | 4.03598300  | 1.05265400  | -2.50059500 |
| O | 1.61406300  | 0.58763200  | -3.20359100 |
| O | 3.33285400  | -1.32465200 | -3.31943600 |
| K | 3.47758900  | 1.88997000  | -0.23689800 |
| H | 1.77056000  | 0.79094700  | -4.13338700 |
| K | 2.84533100  | -2.97849700 | -1.54519900 |

## TS1

|   |             |             |             |
|---|-------------|-------------|-------------|
| C | 0.86187200  | 3.89693800  | 0.27177800  |
| C | 0.50150800  | 2.57690900  | 0.06815700  |
| F | 3.70637100  | 1.08424000  | -0.59582600 |
| F | 4.43026700  | 3.61405100  | -0.22649800 |
| F | 2.57168900  | 5.51200800  | 0.35407400  |
| F | -0.05845200 | 4.82135400  | 0.53989400  |
| C | -0.36240200 | -0.23679200 | -1.28223600 |
| F | 1.40021700  | -2.28917400 | -2.14985200 |
| F | 3.15737000  | -4.22827900 | -1.65797300 |
| F | 4.68842000  | -4.16148400 | 0.58797700  |
| F | 4.43970400  | -2.10082600 | 2.34261400  |
| C | -0.88541500 | 0.62336800  | -2.24780600 |
| C | -2.07755000 | 0.37818400  | -2.91838200 |
| C | -2.80662600 | -0.76797800 | -2.62099200 |
| C | -2.31591200 | -1.65202400 | -1.67516400 |
| H | 0.29094000  | -0.02555900 | 1.35535500  |
| C | -1.11745200 | -1.38005000 | -1.04290100 |
| F | -0.24037700 | 1.74899800  | -2.58014600 |
| F | -2.52977200 | 1.23063700  | -3.83984100 |
| F | -3.95807700 | -1.00796400 | -3.23744500 |
| C | 3.03406200  | -3.22132900 | -0.79541000 |
| C | 3.68843900  | -2.13465400 | 1.24563700  |
| F | -3.01898700 | -2.74229900 | -1.33631200 |
| C | 2.77900100  | -1.12534800 | 0.97157900  |
| C | 1.96044300  | -1.11731700 | -0.16008900 |
| C | 3.81754400  | -3.18965300 | 0.34981400  |
| C | 2.12418300  | -2.19835100 | -1.02570600 |
| F | -0.70840200 | -2.28765200 | -0.14244200 |
| B | 0.94146500  | 0.06083600  | -0.43567500 |

|   |             |             |             |
|---|-------------|-------------|-------------|
| F | 2.69497700  | -0.12392900 | 1.85294100  |
| F | -0.81134700 | 2.29558500  | 0.15165100  |
| C | 1.40942900  | 1.55867200  | -0.21969600 |
| C | 2.74198900  | 1.96396000  | -0.30476800 |
| C | 3.14760100  | 3.28000500  | -0.11940500 |
| C | 2.20206100  | 4.25166700  | 0.17495300  |
| H | -0.45946100 | -0.11953800 | 1.23803500  |
| P | -2.99781600 | -0.06046800 | 2.54113800  |
| O | -2.48642200 | -0.40133800 | 1.08802100  |
| O | -4.03598300 | 1.05265400  | 2.50059500  |
| O | -1.61406300 | 0.58763200  | 3.20359100  |
| O | -3.33285400 | -1.32465200 | 3.31943600  |
| K | -3.47758900 | 1.88997000  | 0.23689800  |
| H | -1.77056000 | 0.79094700  | 4.13338700  |
| K | -2.84533100 | -2.97849700 | 1.54519900  |

Int1

|   |             |             |             |
|---|-------------|-------------|-------------|
| C | 2.81969900  | 2.21624000  | 0.76991300  |
| C | 1.86705200  | 1.23054100  | 0.58342900  |
| F | -0.86863200 | 3.19130000  | -0.63954700 |
| F | 0.91621500  | 5.09430600  | -0.25149000 |
| F | 3.42585800  | 4.49500100  | 0.66237900  |
| F | 4.06535900  | 1.88794500  | 1.18955100  |
| C | -0.52432900 | -0.86967400 | 1.06720600  |
| F | -2.15031400 | 1.81019200  | 1.57966400  |
| F | -4.74727000 | 2.41272400  | 1.19419500  |
| F | -6.02360700 | 1.57099400  | -1.05623400 |
| F | -4.65881800 | 0.11358500  | -2.91984400 |
| C | -0.14083400 | -0.67689100 | 2.39275000  |
| C | -0.27177100 | -1.64763300 | 3.38213200  |
| C | -0.82551400 | -2.88012800 | 3.06896100  |
| C | -1.24345300 | -3.11957600 | 1.76722100  |
| H | -0.02800800 | -0.35484900 | -1.14272600 |
| C | -1.08540900 | -2.11879500 | 0.82113700  |
| F | 0.39453600  | 0.48819700  | 2.79008800  |
| F | 0.12855400  | -1.40298100 | 4.63046500  |
| F | -0.96051000 | -3.81833800 | 4.00386400  |
| C | -4.08262500 | 1.70319600  | 0.28162600  |
| C | -4.04171700 | 0.54148200  | -1.81435100 |
| F | -1.78973900 | -4.29351500 | 1.44178000  |
| C | -2.70123100 | 0.24960500  | -1.58965000 |
| C | -1.99762800 | 0.65244900  | -0.46605000 |
| C | -4.73814200 | 1.27705500  | -0.86863300 |
| C | -2.74629100 | 1.37854400  | 0.45669800  |
| F | -1.54152400 | -2.41063400 | -0.42537100 |
| B | -0.45653500 | 0.22154400  | -0.16022100 |
| F | -2.09546600 | -0.48579100 | -2.56264000 |
| F | 2.28174900  | -0.02970900 | 0.88448400  |
| C | 0.57537000  | 1.46303000  | 0.12058600  |
| C | 0.31872100  | 2.80549200  | -0.15370000 |

|   |             |             |             |
|---|-------------|-------------|-------------|
| C | 1.24187500  | 3.83420800  | 0.03057300  |
| C | 2.51290700  | 3.53973100  | 0.49455300  |
| H | 1.70951700  | -1.96967300 | -0.06017600 |
| P | 2.72236100  | -1.84015400 | -2.03921100 |
| O | 1.60601300  | -2.35175800 | -0.94330300 |
| O | 4.10743000  | -2.18819700 | -1.58866100 |
| O | 2.69104200  | -0.19520900 | -1.83338200 |
| O | 2.10204600  | -2.20697300 | -3.34934600 |
| K | 4.95788300  | -0.13557600 | -0.38974100 |
| H | 1.83789500  | 0.20128000  | -2.06144900 |
| K | -0.38588200 | -2.54483500 | -2.78853900 |

## Int2

|   |             |             |             |
|---|-------------|-------------|-------------|
| O | -3.44715900 | -1.85207300 | -1.91931900 |
| K | -1.07737000 | -2.50679200 | -1.85705200 |
| B | 0.77314500  | 0.07941900  | -0.21585200 |
| C | 2.23976800  | -0.37044300 | -0.75982600 |
| C | 0.60355100  | -0.51741600 | 1.30232800  |
| C | 0.45500700  | 1.67937600  | -0.31024000 |
| C | 3.40396700  | 0.02026900  | -0.10271700 |
| C | 4.67643500  | -0.37308400 | -0.48827000 |
| C | 4.82183200  | -1.21729400 | -1.58354200 |
| C | 3.69402200  | -1.64722600 | -2.26482500 |
| C | 2.44319500  | -1.21756000 | -1.83673900 |
| C | 1.27350200  | 2.69952600  | -0.78690600 |
| C | 0.87564100  | 4.03342100  | -0.87512600 |
| C | -0.40303900 | 4.40359800  | -0.48732900 |
| C | -1.25527600 | 3.41780100  | -0.01565300 |
| C | -0.81028000 | 2.11190300  | 0.06052200  |
| C | 0.64623300  | 0.20386200  | 2.49190300  |
| C | 0.52158100  | -0.38006800 | 3.74892000  |
| C | 0.35339200  | -1.75274700 | 3.85713700  |
| C | 0.31077800  | -2.52090400 | 2.70151200  |
| C | 0.43729800  | -1.88628000 | 1.47551200  |
| F | 1.38601100  | -1.69508900 | -2.55028400 |
| F | 3.81484700  | -2.47005400 | -3.31096200 |
| F | 6.03343300  | -1.61329100 | -1.97088900 |
| F | 5.75718000  | 0.04229700  | 0.17270700  |
| F | 3.30905400  | 0.83463300  | 0.95908500  |
| F | -1.71470700 | 1.21363800  | 0.54143000  |
| F | -0.80996600 | 5.66839100  | -0.57879100 |
| F | 1.71087400  | 4.96003000  | -1.34293400 |
| F | 2.51804400  | 2.44526900  | -1.21136600 |
| F | 0.39172000  | -2.69638100 | 0.38121800  |
| F | 0.80365900  | 1.53813600  | 2.48012700  |
| F | 0.14695900  | -3.84368300 | 2.78014500  |
| F | 0.23170300  | -2.32732600 | 5.05299200  |
| F | 0.55883400  | 0.36869900  | 4.85307500  |
| F | -2.52275500 | 3.72450400  | 0.35503300  |
| H | -0.07966000 | -0.43903600 | -0.90286800 |
| K | -4.32077600 | 1.65956600  | 0.55688200  |
| P | -4.81364800 | -1.55050700 | -1.36921100 |
| O | -5.01723900 | -0.51281000 | -0.29665000 |
| O | -5.80002000 | -1.11693400 | -2.59002000 |
| O | -5.41985800 | -2.97081700 | -0.85982400 |
| H | -6.20383200 | -2.83578400 | -0.31332300 |
| H | -5.59819500 | -1.61465500 | -3.39188100 |

KH<sub>3</sub>PO<sub>4</sub>-BCF(M062x/6-311++G\*\*)

## Reactant

|   |             |             |             |
|---|-------------|-------------|-------------|
| C | -0.42748200 | 3.69932900  | 0.08755600  |
| C | -0.33258300 | 2.32450800  | 0.19824100  |
| F | 2.99874100  | 1.76681900  | -1.02699900 |
| F | 2.85409700  | 4.40737800  | -1.23939800 |
| F | 0.58745200  | 5.73457500  | -0.52284400 |
| F | -1.56018300 | 4.32943600  | 0.41773600  |
| C | -0.37557600 | -0.85588700 | -0.62231000 |
| F | 1.96274200  | -2.18011400 | -1.68783100 |
| F | 4.39363700  | -3.22776700 | -1.37496900 |
| F | 6.03940800  | -2.32782900 | 0.59084500  |
| F | 5.21376700  | -0.33171300 | 2.24660400  |
| C | -1.35150300 | -0.37681300 | -1.49181400 |
| C | -2.38791400 | -1.15122000 | -1.98111300 |
| C | -2.49772400 | -2.47636000 | -1.59737900 |
| C | -1.55525200 | -3.00589100 | -0.72815400 |
| H | 0.59516300  | 0.06164900  | 1.72848500  |
| C | -0.53419600 | -2.19649200 | -0.25688600 |
| F | -1.37462300 | 0.92147700  | -1.88412700 |
| F | -3.34421200 | -0.57879100 | -2.73180400 |
| F | -3.50868900 | -3.21458000 | -2.02611600 |
| C | 3.98625200  | -2.25926100 | -0.55764500 |
| C | 4.40649600  | -0.78164700 | 1.28840800  |
| F | -1.65927600 | -4.27021000 | -0.33078300 |
| C | 3.14285300  | -0.24283400 | 1.10772500  |
| C | 2.25018800  | -0.68297100 | 0.13149100  |
| C | 4.83025400  | -1.80012000 | 0.44373800  |
| C | 2.72141000  | -1.70175600 | -0.69419900 |
| F | 0.32559900  | -2.75166300 | 0.59728900  |
| B | 0.82408900  | -0.00293300 | -0.04277800 |
| F | 2.78009300  | 0.75645700  | 1.92774200  |
| F | -1.42341400 | 1.68654200  | 0.66700000  |
| C | 0.79436200  | 1.58932800  | -0.15723500 |
| C | 1.86068400  | 2.34900400  | -0.63735500 |
| C | 1.81031400  | 3.73458300  | -0.76468900 |
| C | 0.65839000  | 4.41553900  | -0.40039900 |
| H | -0.09639900 | -0.27667600 | 1.73468400  |
| P | -3.20482400 | -0.79970100 | 1.94087300  |
| O | -1.75007100 | -1.04582400 | 2.21845500  |
| O | -3.80420400 | -0.96422600 | 0.57264900  |
| O | -3.56725000 | 0.78451400  | 2.28436200  |
| H | -3.10357800 | 1.09180700  | 3.07325700  |
| K | -3.94059300 | 1.36366400  | -0.35694500 |

|            |             |             |             |
|------------|-------------|-------------|-------------|
| O          | -4.08290000 | -1.60313300 | 3.04007400  |
| H          | -3.49667900 | -2.11326900 | 3.61302500  |
| <b>TS1</b> |             |             |             |
| C          | -0.42748200 | 3.69932900  | 0.08755600  |
| C          | -0.33258300 | 2.32450800  | 0.19824100  |
| F          | 2.99874100  | 1.76681900  | -1.02699900 |
| F          | 2.85409700  | 4.40737800  | -1.23939800 |
| F          | 0.58745100  | 5.73457500  | -0.52284400 |
| F          | -1.56018300 | 4.32943600  | 0.41773600  |
| C          | -0.37557600 | -0.85588700 | -0.62231000 |
| F          | 1.96274200  | -2.18011400 | -1.68783100 |
| F          | 4.39363700  | -3.22776700 | -1.37496900 |
| F          | 6.03940800  | -2.32782800 | 0.59084500  |
| F          | 5.21376700  | -0.33171300 | 2.24660400  |
| C          | -1.35150300 | -0.37681300 | -1.49181400 |
| C          | -2.38791400 | -1.15122000 | -1.98111300 |
| C          | -2.49772400 | -2.47636000 | -1.59737900 |
| C          | -1.55525200 | -3.00589100 | -0.72815400 |
| H          | 0.59516300  | 0.06164900  | 1.72848500  |
| C          | -0.53419600 | -2.19649200 | -0.25688600 |
| F          | -1.37462300 | 0.92147700  | -1.88412700 |
| F          | -3.34421200 | -0.57879100 | -2.73180400 |
| F          | -3.50868900 | -3.21458000 | -2.02611600 |
| C          | 3.98625200  | -2.25926100 | -0.55764500 |
| C          | 4.40649600  | -0.78164700 | 1.28840800  |
| F          | -1.65927600 | -4.27021000 | -0.33078300 |
| C          | 3.14285300  | -0.24283400 | 1.10772500  |
| C          | 2.25018800  | -0.68297100 | 0.13149100  |
| C          | 4.83025400  | -1.80012000 | 0.44373800  |
| C          | 2.72141000  | -1.70175600 | -0.69419900 |
| F          | 0.32559900  | -2.75166300 | 0.59728900  |
| B          | 0.82408900  | -0.00293300 | -0.04277800 |
| F          | 2.78009300  | 0.75645700  | 1.92774200  |
| F          | -1.42341400 | 1.68654200  | 0.66700000  |
| C          | 0.79436200  | 1.58932800  | -0.15723500 |
| C          | 1.86068400  | 2.34900400  | -0.63735500 |
| C          | 1.81031400  | 3.73458300  | -0.76468900 |
| C          | 0.65839000  | 4.41553900  | -0.40039900 |
| H          | -0.09639900 | -0.27667600 | 1.73468400  |
| P          | -3.20482400 | -0.79970100 | 1.94087300  |
| O          | -1.75007100 | -1.04582400 | 2.21845500  |
| O          | -3.80420400 | -0.96422600 | 0.57264900  |
| O          | -3.56725000 | 0.78451400  | 2.28436200  |
| H          | -3.10357800 | 1.09180700  | 3.07325700  |
| K          | -3.94059300 | 1.36366400  | -0.35694500 |
| O          | -4.08290000 | -1.60313300 | 3.04007400  |
| H          | -3.49667900 | -2.11326900 | 3.61302500  |

**Int1**

|   |             |             |             |
|---|-------------|-------------|-------------|
| C | -0.84211100 | 3.61059700  | 0.64440800  |
| C | -0.55213900 | 2.26467700  | 0.76420400  |
| F | 2.93675500  | 2.20957300  | -0.01373300 |
| F | 2.45227600  | 4.80514400  | -0.18363700 |
| F | -0.05896500 | 5.79433100  | 0.20062200  |
| F | -2.10997700 | 4.04623100  | 0.78990700  |
| C | -0.22185900 | -0.70583400 | -0.43197900 |
| F | 2.24224400  | 0.07717100  | -1.87632000 |
| F | 4.66150400  | -1.01463100 | -2.34666600 |

|             |             |             |             |
|-------------|-------------|-------------|-------------|
| F           | 6.02369900  | -2.22691500 | -0.32312100 |
| F           | 4.93794900  | -2.33360700 | 2.16842800  |
| C           | -0.95231700 | -0.16212700 | -1.47725000 |
| C           | -1.86852800 | -0.86443200 | -2.25010500 |
| C           | -2.08836100 | -2.20829200 | -2.00993600 |
| C           | -1.36654900 | -2.81144200 | -0.99013900 |
| H           | 0.41525200  | -0.25284400 | 1.74046800  |
| C           | -0.46169900 | -2.06788100 | -0.24285000 |
| F           | -0.88236300 | 1.16491300  | -1.77131800 |
| F           | -2.61468900 | -0.20600700 | -3.15823000 |
| F           | -2.99131500 | -2.89118100 | -2.70682700 |
| C           | 4.12798000  | -1.07133400 | -1.12343500 |
| C           | 4.26896800  | -1.74020600 | 1.17632300  |
| F           | -1.61102800 | -4.09367600 | -0.67125600 |
| C           | 3.01518400  | -1.17771400 | 1.39756400  |
| C           | 2.28074700  | -0.55073100 | 0.39901500  |
| C           | 4.82654500  | -1.68768100 | -0.09216700 |
| C           | 2.88326600  | -0.52436800 | -0.85445500 |
| F           | 0.15911900  | -2.71993400 | 0.74847800  |
| B           | 0.79477300  | 0.05349300  | 0.62413900  |
| F           | 2.53183100  | -1.26917900 | 2.64550900  |
| F           | -1.61892700 | 1.46088400  | 1.05554300  |
| C           | 0.68369300  | 1.68216600  | 0.52927400  |
| C           | 1.68055400  | 2.60334300  | 0.22080100  |
| C           | 1.45472700  | 3.97697400  | 0.12151500  |
| C           | 0.18146000  | 4.48988600  | 0.32132900  |
| H           | -1.31595000 | -0.67141100 | 1.95003200  |
| P           | -3.37951600 | -1.40758300 | 1.58585000  |
| O           | -1.97449300 | -1.30039700 | 2.30657700  |
| O           | -3.57168900 | -0.53759700 | 0.40136900  |
| O           | -4.47993600 | -1.10212200 | 2.69126100  |
| H           | -4.42237100 | -1.66408300 | 3.47634400  |
| K           | -3.42601600 | 1.61200900  | -0.88391200 |
| O           | -3.57940300 | -2.97252300 | 1.36653600  |
| H           | -2.83996000 | -3.45409500 | 0.96399600  |
| <b>Int2</b> |             |             |             |
| O           | -1.88727300 | -1.46724700 | -3.34054100 |
| K           | 0.52207600  | -2.08417600 | -3.29965200 |
| B           | 0.18029500  | 0.10892800  | -0.17315600 |
| C           | 1.80425100  | 0.30498300  | -0.20721900 |
| C           | -0.13273200 | -1.10958100 | 0.88418200  |
| C           | -0.60901400 | 1.51489700  | 0.14794600  |
| C           | 2.51372100  | 0.61659100  | 0.95108600  |
| C           | 3.89045600  | 0.79010200  | 0.99255900  |
| C           | 4.63052800  | 0.64521700  | -0.17429000 |
| C           | 3.97406200  | 0.33450400  | -1.35520000 |
| C           | 2.59478500  | 0.17527500  | -1.33689200 |
| C           | -0.07623600 | 2.77579000  | -0.12585400 |



|   |             |             |             |
|---|-------------|-------------|-------------|
| C | -0.74445300 | 3.97098500  | 0.12123600  |
| C | -2.02421200 | 3.94500400  | 0.65365600  |
| C | -2.61690400 | 2.71879700  | 0.92004600  |
| C | -1.90563000 | 1.55887500  | 0.65590900  |
| C | -0.50449700 | -0.97631500 | 2.22272100  |
| C | -0.70770900 | -2.05581700 | 3.07630000  |
| C | -0.52535800 | -3.34956500 | 2.60821600  |
| C | -0.13831500 | -3.53984400 | 1.28999000  |
| C | 0.04819100  | -2.42825200 | 0.48336600  |
| F | 2.02905300  | -0.11079100 | -2.54617700 |
| F | 4.66450600  | 0.18311900  | -2.48955100 |
| F | 5.95249800  | 0.79885200  | -0.15887400 |
| F | 4.50966300  | 1.08876300  | 2.13366300  |
| F | 1.84848500  | 0.78506900  | 2.10292200  |
| F | -2.57318700 | 0.40281300  | 0.90524800  |
| F | -2.68010500 | 5.07745300  | 0.89100300  |
| F | -0.16841200 | 5.13908800  | -0.16105500 |
| F | 1.14428800  | 2.90082300  | -0.67333400 |
| F | 0.45523800  | -2.69852600 | -0.78895100 |
| F | -0.69535800 | 0.23361700  | 2.76127300  |
| F | 0.05590000  | -4.77304400 | 0.81564400  |
| F | -0.71147800 | -4.39237300 | 3.41296800  |
| F | -1.07174600 | -1.86049500 | 4.34274700  |
| F | -3.85572700 | 2.66567300  | 1.40907800  |
| H | -0.18691000 | -0.26888100 | -1.28056700 |
| P | -2.87377600 | -0.95423800 | -2.36311700 |
| O | -2.78312400 | 0.60605000  | -2.04937000 |
| H | -1.88604300 | 0.92535100  | -1.85020300 |
| O | -4.35672800 | -1.13530600 | -2.89074100 |
| H | -5.04375400 | -0.92435700 | -2.24386800 |
| O | -2.84748100 | -1.69439200 | -0.95349100 |
| H | -2.55889300 | -1.14693500 | -0.20229700 |

### K<sub>2</sub>CO<sub>3</sub>-BCF-Solvent (M062x/6-311++G\*\*)

#### Reactant

|   |             |             |             |
|---|-------------|-------------|-------------|
| C | -2.55568900 | -1.30591700 | 0.63169200  |
| O | -3.25023100 | -2.04921400 | -0.17276300 |
| O | -3.13338900 | -0.38221900 | 1.32784900  |
| K | -3.30764900 | 1.98213600  | 2.05747800  |
| O | -1.28071000 | -1.48620500 | 0.72054900  |
| B | 1.70557100  | 0.67983600  | -0.60042900 |
| C | 0.28263800  | 0.44621400  | -1.19519600 |
| C | 2.80658600  | -0.44593800 | -0.62785300 |
| C | 2.08901700  | 2.08458300  | 0.00244900  |
| C | 0.02792900  | -0.47573600 | -2.21508100 |
| C | -1.23393800 | -0.70168700 | -2.73549500 |
| C | -2.31750800 | 0.01916600  | -2.25156600 |
| C | -2.11699500 | 0.95474800  | -1.24951700 |
| C | -0.84564100 | 1.12908100  | -0.73238200 |
| C | 1.65890800  | 3.28693300  | -0.56210900 |
| C | 2.00253800  | 4.52923700  | -0.05261500 |
| C | 2.80060500  | 4.60228900  | 1.08068100  |
| C | 3.25211500  | 3.43487300  | 1.68015000  |
| C | 2.90205200  | 2.21176300  | 1.13032600  |
| C | 4.16164400  | -0.15691800 | -0.80885700 |
| C | 5.15326000  | -1.12577400 | -0.80329100 |
| C | 4.80584000  | -2.45240400 | -0.59233400 |
| C | 3.47355600  | -2.79066000 | -0.40107600 |
| C | 2.50847300  | -1.79689900 | -0.43096000 |
| F | -0.74498000 | 2.00772900  | 0.27741600  |
| F | -3.13674600 | 1.69442200  | -0.80382800 |
| F | -3.51898500 | -0.15939800 | -2.77975800 |

|     |             |             |             |
|-----|-------------|-------------|-------------|
| F   | -1.41889700 | -1.59962600 | -3.70893600 |
| F   | 1.02818000  | -1.18395100 | -2.75910900 |
| F   | 3.37701000  | 1.12139900  | 1.74629300  |
| F   | 3.13055800  | 5.78370300  | 1.58844900  |
| F   | 1.57160900  | 5.64805600  | -0.63509800 |
| F   | 0.88737400  | 3.28416600  | -1.65650200 |
| F   | 1.24551800  | -2.18652300 | -0.23986200 |
| F   | 4.56468900  | 1.10313100  | -1.01485700 |
| F   | 3.13218100  | -4.06396300 | -0.19942200 |
| F   | 5.74190400  | -3.39309000 | -0.57628800 |
| F   | 6.43060300  | -0.79435700 | -0.99056600 |
| F   | 4.01962000  | 3.49937900  | 2.76798200  |
| H   | 0.46597600  | -0.38996200 | 1.55770800  |
| H   | 1.07795900  | -0.06478500 | 1.84662700  |
| C   | -5.94429300 | 0.21984200  | -0.48424000 |
| C   | -6.13991300 | 1.46050500  | -1.37591500 |
| C   | -6.26047000 | 0.76253800  | 0.90154700  |
| C   | -5.98954500 | 2.64587500  | -0.39731700 |
| O   | -5.71138900 | 2.08415000  | 0.88955300  |
| H   | -6.59707100 | -0.60994100 | -0.76818300 |
| H   | -4.90728900 | -0.13172800 | -0.48203000 |
| H   | -7.13510800 | 1.46866700  | -1.82900000 |
| H   | -5.40254700 | 1.50319800  | -2.17975300 |
| H   | -5.76923200 | 0.20534400  | 1.70244500  |
| H   | -7.34325700 | 0.81805600  | 1.09035600  |
| H   | -6.91251300 | 3.23662900  | -0.33965700 |
| H   | -5.16148400 | 3.31360000  | -0.64887100 |
| K   | -1.24599500 | -3.66751500 | -0.67951200 |
| C   | -1.21091500 | -3.17841800 | 3.42074600  |
| C   | 0.22512500  | -3.35526700 | 2.90649000  |
| C   | -2.03162000 | -4.12704500 | 2.52536700  |
| C   | 0.19028000  | -4.77887700 | 2.36775500  |
| O   | -1.08913100 | -4.88406100 | 1.74259700  |
| H   | -1.28915700 | -3.47610400 | 4.47101500  |
| H   | -1.55179000 | -2.14735900 | 3.31055700  |
| H   | 0.98221500  | -3.21333800 | 3.68200700  |
| H   | 0.39665100  | -2.65491500 | 2.08477900  |
| H   | -2.67469400 | -3.58491600 | 1.82506600  |
| H   | -2.64201800 | -4.82149900 | 3.11468200  |
| H   | 0.27303500  | -5.51877500 | 3.17799300  |
| H   | 0.94956200  | -4.99508200 | 1.61115100  |
| TS1 |             |             |             |
| C   | -2.26305200 | -1.24020400 | 0.90691100  |
| O   | -3.11144300 | -2.07491800 | 0.40400800  |
| O   | -2.65817200 | -0.18463100 | 1.53078500  |
| K   | -3.52719600 | 2.12658200  | 1.80194400  |
| O   | -0.99534300 | -1.47892300 | 0.77290900  |
| B   | 1.60899300  | 0.57700600  | -0.56746100 |
| C   | 0.21976100  | 0.38369100  | -1.27914600 |
| C   | 2.78018300  | -0.48088900 | -0.74202900 |
| C   | 1.99372600  | 1.98586600  | 0.05192600  |
| C   | 0.00234900  | -0.52574300 | -2.31426000 |
| C   | -1.25288000 | -0.80098700 | -2.83278500 |
| C   | -2.35974100 | -0.13477900 | -2.32895000 |
| C   | -2.19057600 | 0.80637600  | -1.32703000 |
| C   | -0.92639300 | 1.03345700  | -0.81514900 |
| C   | 1.60888700  | 3.19636500  | -0.52108300 |
| C   | 1.97432700  | 4.43031200  | -0.00284400 |
| C   | 2.75258900  | 4.48422000  | 1.14423400  |
| C   | 3.16297400  | 3.30493600  | 1.74992600  |
| C   | 2.78964200  | 2.09262400  | 1.19201000  |
| C   | 4.10495800  | -0.10515600 | -0.96610600 |
| C   | 5.14327700  | -1.01839900 | -1.09472500 |

|      |             |             |             |
|------|-------------|-------------|-------------|
| C    | 4.87679300  | -2.37406600 | -0.98562900 |
| C    | 3.57401300  | -2.79846700 | -0.76276600 |
| C    | 2.56359700  | -1.85711000 | -0.65740100 |
| F    | -0.84730300 | 1.91696600  | 0.19000000  |
| F    | -3.24783200 | 1.48650500  | -0.87085300 |
| F    | -3.57026800 | -0.38017700 | -2.82023300 |
| F    | -1.40491400 | -1.69363900 | -3.81614800 |
| F    | 1.02699400  | -1.18808100 | -2.87192300 |
| F    | 3.22738400  | 0.98530800  | 1.80829500  |
| F    | 3.10338100  | 5.65836900  | 1.65951800  |
| F    | 1.58266100  | 5.56054400  | -0.59347700 |
| F    | 0.85857700  | 3.21490300  | -1.63171200 |
| F    | 1.32675200  | -2.32426900 | -0.45662300 |
| F    | 4.44028000  | 1.18699700  | -1.08903100 |
| F    | 3.30599500  | -4.10157800 | -0.65953100 |
| F    | 5.85961300  | -3.26145900 | -1.09982900 |
| F    | 6.39064200  | -0.60249500 | -1.31822300 |
| F    | 3.91443600  | 3.34839600  | 2.85114700  |
| H    | 0.44359100  | -0.47075500 | 1.08352600  |
| H    | 1.12631200  | -0.10500500 | 1.20753300  |
| C    | -6.49574500 | -0.10724900 | -1.05080600 |
| C    | -6.38612100 | 1.26929600  | -1.71664000 |
| C    | -5.80399400 | 0.10845200  | 0.30060900  |
| C    | -6.51899900 | 2.19625700  | -0.51467600 |
| O    | -5.83298000 | 1.53315100  | 0.54887600  |
| H    | -7.54880000 | -0.37137200 | -0.90982600 |
| H    | -6.01701100 | -0.90111800 | -1.62844200 |
| H    | -7.15764500 | 1.44553300  | -2.46966700 |
| H    | -5.40409100 | 1.39475500  | -2.18061100 |
| H    | -4.75868000 | -0.21980000 | 0.30464700  |
| H    | -6.32928400 | -0.39642700 | 1.11885500  |
| H    | -7.57457000 | 2.33873700  | -0.24231200 |
| H    | -6.05559600 | 3.17654900  | -0.65648900 |
| K    | -1.19728900 | -3.86338400 | -0.13895500 |
| C    | -1.20283500 | -2.98019400 | 4.37491600  |
| C    | -0.05933900 | -2.16694700 | 3.76200000  |
| C    | -1.63995800 | -3.81756300 | 3.17972000  |
| C    | 0.59244200  | -3.17759800 | 2.81744600  |
| O    | -0.42769500 | -4.13745200 | 2.47972400  |
| H    | -0.83621100 | -3.62789100 | 5.17900500  |
| H    | -2.01226900 | -2.35892100 | 4.76570700  |
| H    | 0.64397400  | -1.77998200 | 4.50351300  |
| H    | -0.46591700 | -1.34112500 | 3.17108900  |
| H    | -2.30105700 | -3.24071600 | 2.51774000  |
| H    | -2.12662900 | -4.75827100 | 3.45228100  |
| H    | 1.41620800  | -3.71956200 | 3.29759500  |
| H    | 0.94611400  | -2.70386800 | 1.89752600  |
| Int1 |             |             |             |
| C    | 2.61699900  | -1.60699300 | -0.96527600 |
| O    | 3.29682700  | -2.59237700 | -0.61634500 |
| O    | 2.97587400  | -0.51321400 | -1.45305900 |
| K    | 3.65765200  | 1.82950800  | -2.07535500 |
| O    | 1.25537400  | -1.78372800 | -0.77434700 |
| B    | -1.34604500 | 0.48470300  | -0.16755900 |
| C    | -0.10280900 | 0.57500300  | 0.90198600  |
| C    | -2.54699000 | -0.54873000 | 0.25402100  |
| C    | -1.84766300 | 2.01356900  | -0.43254500 |
| C    | -0.05723100 | 0.10071700  | 2.20842500  |
| C    | 1.07281700  | 0.17230700  | 3.01515800  |
| C    | 2.22907500  | 0.76383100  | 2.53005400  |
| C    | 2.22609400  | 1.28384600  | 1.24527500  |
| C    | 1.07580500  | 1.18303600  | 0.47899900  |
| C    | -2.30346700 | 2.81116800  | 0.61189600  |

|             |             |             |             |
|-------------|-------------|-------------|-------------|
| C           | -2.69785100 | 4.13126700  | 0.46330900  |
| C           | -2.63765600 | 4.71411300  | -0.79537500 |
| C           | -2.18714800 | 3.96414800  | -1.86939800 |
| C           | -1.80252500 | 2.64218100  | -1.66932200 |
| C           | -3.91221400 | -0.27895800 | 0.21046400  |
| C           | -4.90089900 | -1.21392800 | 0.50604900  |
| C           | -4.54507500 | -2.50151900 | 0.86650300  |
| C           | -3.19838800 | -2.82922600 | 0.92043200  |
| C           | -2.25423400 | -1.86492700 | 0.60877100  |
| F           | 1.14272400  | 1.71744400  | -0.76181700 |
| F           | 3.32577500  | 1.88150800  | 0.75617300  |
| F           | 3.31905900  | 0.84603100  | 3.29741900  |
| F           | 1.05609200  | -0.31951600 | 4.25966600  |
| F           | -1.13778300 | -0.46951100 | 2.77343000  |
| F           | -1.37561100 | 1.98167100  | -2.76232200 |
| F           | -3.00940800 | 5.98599100  | -0.96693500 |
| F           | -3.13826700 | 4.84723800  | 1.50507100  |
| F           | -2.39949600 | 2.28348500  | 1.84852000  |
| F           | -0.96557900 | -2.26683500 | 0.66926700  |
| F           | -4.37230300 | 0.93865700  | -0.13610200 |
| F           | -2.82479300 | -4.06930000 | 1.26598000  |
| F           | -5.47772500 | -3.41257800 | 1.15296000  |
| F           | -6.19424700 | -0.87889200 | 0.43500600  |
| F           | -2.12324600 | 4.52139500  | -3.08570300 |
| H           | 0.77884800  | -0.97618600 | -1.02098600 |
| H           | -0.87510200 | 0.05706400  | -1.20635500 |
| C           | 5.56676500  | -0.38943400 | 0.98106700  |
| C           | 6.18029000  | 0.90329900  | 1.55120200  |
| C           | 6.00166100  | -0.34131300 | -0.47723600 |
| C           | 6.40714400  | 1.78346000  | 0.30149400  |
| O           | 5.90201900  | 1.04549400  | -0.81597600 |
| H           | 5.91167700  | -1.28893900 | 1.49605600  |
| H           | 4.47261100  | -0.36524100 | 1.02146500  |
| H           | 7.13220700  | 0.69671500  | 2.04718800  |
| H           | 5.52084600  | 1.38567900  | 2.27406800  |
| H           | 5.34372200  | -0.90035000 | -1.14301300 |
| H           | 7.04525600  | -0.67104700 | -0.59447000 |
| H           | 7.47392200  | 1.98792400  | 0.14567600  |
| H           | 5.87135100  | 2.73571500  | 0.33862100  |
| K           | 1.27486200  | -4.07814300 | 0.52125600  |
| C           | -0.06218800 | -2.82683500 | -3.50892500 |
| C           | -1.34044400 | -2.82571900 | -2.64850600 |
| C           | 0.77639500  | -3.98599700 | -2.92819000 |
| C           | -1.34263800 | -4.23217500 | -2.06100100 |
| O           | 0.03375800  | -4.51916700 | -1.82477600 |
| H           | -0.29615700 | -3.01375900 | -4.55999200 |
| H           | 0.46810000  | -1.87371500 | -3.44494400 |
| H           | -2.24295500 | -2.60919700 | -3.22489200 |
| H           | -1.25847000 | -2.09043100 | -1.84443400 |
| H           | 1.74684800  | -3.66475400 | -2.54118700 |
| H           | 0.92949400  | -4.77809000 | -3.67148200 |
| H           | -1.75774600 | -4.96118300 | -2.77226900 |
| H           | -1.87129100 | -4.32393900 | -1.10885700 |
| <b>Int2</b> |             |             |             |
| C           | -3.24610500 | 1.69407200  | 1.37338700  |
| O           | -4.57728000 | 2.07003700  | 1.58067500  |
| O           | -2.45719200 | 1.93098500  | 2.31414700  |
| K           | 0.02906700  | 1.46713100  | 2.92539800  |
| O           | -3.04337500 | 1.15896500  | 0.27028700  |
| B           | 0.80426900  | -0.39938700 | -0.19589700 |
| C           | 1.53958500  | -1.67158500 | 0.51463200  |
| C           | 1.98491200  | 0.60211000  | -0.73380400 |
| C           | -0.30098200 | -0.77549200 | -1.33634200 |

|   |             |             |             |
|---|-------------|-------------|-------------|
| C | 2.43591900  | -2.48276500 | -0.17541900 |
| C | 3.12937400  | -3.53477000 | 0.40171100  |
| C | 2.94083400  | -3.81133200 | 1.74994000  |
| C | 2.06733100  | -3.02860900 | 2.48651100  |
| C | 1.39775700  | -1.98399300 | 1.85855400  |
| C | -0.67582900 | -2.03906900 | -1.77825000 |
| C | -1.70286600 | -2.26590500 | -2.68975800 |
| C | -2.41787500 | -1.19388400 | -3.19495200 |
| C | -2.08297500 | 0.09028000  | -2.78902800 |
| C | -1.04272700 | 0.26657000  | -1.89114900 |
| C | 2.34230100  | 0.84685500  | -2.05509400 |
| C | 3.36154400  | 1.71671400  | -2.42731200 |
| C | 4.09195400  | 2.37759900  | -1.45239700 |
| C | 3.78847500  | 2.15537200  | -0.11713900 |
| C | 2.75335600  | 1.28897400  | 0.20031000  |
| F | 0.57265000  | -1.25951100 | 2.65122100  |
| F | 1.88449900  | -3.27862400 | 3.78863300  |
| F | 3.59650500  | -4.82045400 | 2.32834700  |
| F | 3.97412100  | -4.28455500 | -0.31530000 |
| F | 2.64826500  | -2.26207400 | -1.48565600 |
| F | -0.73410300 | 1.53504000  | -1.57701100 |
| F | -3.41813800 | -1.39102800 | -4.06069100 |
| F | -2.02313200 | -3.51286700 | -3.06175800 |
| F | -0.06526700 | -3.14948000 | -1.31550500 |
| F | 2.48871700  | 1.13773000  | 1.52199600  |
| F | 1.70086200  | 0.23679900  | -3.06827600 |
| F | 4.48497300  | 2.78258000  | 0.83927600  |
| F | 5.07869700  | 3.20965800  | -1.79303500 |
| F | 3.65492500  | 1.91154900  | -3.71755700 |
| F | -2.76509000 | 1.13724400  | -3.27163400 |
| H | 0.19232600  | 0.20928900  | 0.65724300  |
| C | -0.87735900 | 4.23805200  | 0.27567600  |
| C | 0.62309400  | 4.13690100  | -0.10059400 |
| C | -0.84388600 | 4.64298900  | 1.75204300  |
| C | 1.34429300  | 4.37042900  | 1.23849600  |
| O | 0.37504700  | 4.07974500  | 2.24593900  |
| H | -1.41860800 | 4.96418700  | -0.33534400 |
| H | -1.36462200 | 3.26411700  | 0.17025000  |
| H | 0.92204900  | 4.88032100  | -0.84333800 |
| H | 0.84963600  | 3.14633300  | -0.50437200 |
| H | -1.66692400 | 4.23245200  | 2.33859400  |
| H | -0.80402400 | 5.73569100  | 1.86974300  |
| H | 1.66189500  | 5.41766600  | 1.33866900  |
| H | 2.20916700  | 3.72634900  | 1.41092500  |
| K | -5.51209600 | 0.42463700  | -0.42260800 |
| C | -2.27386900 | -2.49777700 | 1.28618300  |
| C | -2.50072400 | -1.48693300 | 2.41155400  |
| C | -4.02018800 | -1.33943000 | 2.40499400  |
| C | -3.31633700 | -2.04010400 | 0.27273700  |
| H | -1.25825600 | -2.46691000 | 0.88256500  |
| H | -2.48669400 | -3.51720400 | 1.62590400  |
| H | -2.03585800 | -0.53232100 | 2.14589700  |
| H | -2.11756300 | -1.81546600 | 3.38010500  |
| H | -4.50076900 | -2.07960900 | 3.05627800  |
| H | -4.35590800 | -0.33958900 | 2.69932000  |
| H | -3.66456000 | -2.83249600 | -0.39672400 |
| H | -2.93454800 | -1.19200000 | -0.31081000 |
| O | -4.43912000 | -1.58813000 | 1.05119600  |
| H | -4.63554100 | 2.46002700  | 2.46319500  |

KHCO<sub>3</sub>-BCF-Solvent (M062x/6-311++G\*\*)

Reactant

|     |             |             |             |
|-----|-------------|-------------|-------------|
| C   | 2.08018900  | -1.64457200 | -1.59736200 |
| O   | 1.51944400  | -2.26770000 | -2.70272000 |
| O   | 2.31002500  | -0.42193700 | -1.76719200 |
| K   | 3.13713400  | 1.94582400  | -1.88728000 |
| O   | 2.28646100  | -2.35156100 | -0.59506600 |
| B   | -1.42467600 | 0.05874700  | 0.48298600  |
| C   | -0.00807600 | -0.29636000 | 1.04316100  |
| C   | -2.44711700 | -1.07805200 | 0.12720500  |
| C   | -1.84310300 | 1.56271800  | 0.29183400  |
| C   | 0.22310800  | -1.40338100 | 1.86763700  |
| C   | 1.46652100  | -1.71290900 | 2.38755900  |
| C   | 2.55774700  | -0.92184500 | 2.05801500  |
| C   | 2.38373000  | 0.17562300  | 1.23380100  |
| C   | 1.12106500  | 0.47183700  | 0.75764800  |
| C   | -1.42422400 | 2.57339000  | 1.16117900  |
| C   | -1.79020600 | 3.90173700  | 1.01092700  |
| C   | -2.59688600 | 4.26809100  | -0.05761900 |
| C   | -3.03293600 | 3.30239300  | -0.95439000 |
| C   | -2.66232600 | 1.98140300  | -0.76023500 |
| C   | -3.82469000 | -0.93428100 | 0.31506900  |
| C   | -4.73945300 | -1.92572100 | -0.00052900 |
| C   | -4.28630100 | -3.11714600 | -0.55064500 |
| C   | -2.92814500 | -3.30513000 | -0.76587600 |
| C   | -2.03979100 | -2.29945400 | -0.41797600 |
| F   | 1.02566000  | 1.55766100  | -0.02847100 |
| F   | 3.43199700  | 0.92969100  | 0.88276700  |
| F   | 3.76425700  | -1.22902200 | 2.51928700  |
| F   | 1.63186600  | -2.77385600 | 3.17903700  |
| F   | -0.78958100 | -2.20785600 | 2.21704500  |
| F   | -3.11767200 | 1.09694500  | -1.65613700 |
| F   | -2.94981400 | 5.53690900  | -0.22044200 |
| F   | -1.37289600 | 4.82676300  | 1.87476300  |
| F   | -0.64383900 | 2.28533500  | 2.20934100  |
| F   | -0.74674900 | -2.53787900 | -0.64645100 |
| F   | -4.32319800 | 0.19352800  | 0.83678800  |
| F   | -2.49250900 | -4.44631000 | -1.29825500 |
| F   | -5.14962400 | -4.07294500 | -0.86938600 |
| F   | -6.04299700 | -1.74694800 | 0.21217000  |
| F   | -3.80555000 | 3.65140200  | -1.98242800 |
| H   | 1.34896500  | -3.18161800 | -2.43813700 |
| H   | -0.09110900 | -0.02248800 | -2.04492300 |
| H   | -0.81731800 | 0.08965700  | -2.16776700 |
| C   | 5.51412300  | -1.21038500 | -0.44050700 |
| C   | 6.31216600  | -0.27143100 | 0.48348300  |
| C   | 5.63137700  | -0.51329700 | -1.78962800 |
| C   | 6.30830700  | 1.07737100  | -0.26856800 |
| O   | 5.54918500  | 0.87701900  | -1.46634100 |
| H   | 5.91300000  | -2.22758900 | -0.45692000 |
| H   | 4.45767500  | -1.25759400 | -0.15943800 |
| H   | 7.33674100  | -0.62910200 | 0.61462000  |
| H   | 5.85579500  | -0.18723000 | 1.47129700  |
| H   | 4.81549100  | -0.74295000 | -2.47848300 |
| H   | 6.59786700  | -0.72091100 | -2.27264600 |
| H   | 7.32549200  | 1.38923200  | -0.53606200 |
| H   | 5.82968500  | 1.88525000  | 0.29066600  |
| TS1 |             |             |             |
| C   | 2.30716000  | -1.17650700 | -2.06772300 |
| O   | 3.21168800  | -2.09486700 | -2.56825300 |
| O   | 2.77957300  | -0.03702900 | -1.87306000 |
| K   | 3.61270900  | 2.23915400  | -1.22859100 |

|   |             |             |             |
|---|-------------|-------------|-------------|
| O | 1.14424100  | -1.59144600 | -1.86754800 |
| B | -1.35634400 | -0.02267600 | 0.05425000  |
| C | -0.03120600 | -0.54182900 | 0.75567800  |
| C | -2.61823500 | -0.98551300 | -0.09511900 |
| C | -1.68426300 | 1.54084700  | 0.05667800  |
| C | 0.07752500  | -1.76245800 | 1.41987000  |
| C | 1.27048400  | -2.23033900 | 1.95390600  |
| C | 2.42050700  | -1.46549400 | 1.83574000  |
| C | 2.35875900  | -0.23870000 | 1.19103900  |
| C | 1.15253500  | 0.19018900  | 0.66946900  |
| C | -1.32510400 | 2.40078100  | 1.09138700  |
| C | -1.68127800 | 3.74193800  | 1.11695200  |
| C | -2.42799000 | 4.27128300  | 0.07474300  |
| C | -2.81384800 | 3.45189400  | -0.97664600 |
| C | -2.44577000 | 2.11557900  | -0.95864000 |
| C | -3.86810200 | -0.66699200 | 0.43152700  |
| C | -4.97089300 | -1.50417500 | 0.32022300  |
| C | -4.84713100 | -2.71075700 | -0.35028700 |
| C | -3.62078300 | -3.07030600 | -0.89268100 |
| C | -2.54129800 | -2.21456700 | -0.74796000 |
| F | 1.16216600  | 1.38218600  | 0.05168400  |
| F | 3.45484000  | 0.52247600  | 1.08689800  |
| F | 3.56634700  | -1.89604700 | 2.35564200  |
| F | 1.31725700  | -3.40448900 | 2.58532600  |
| F | -0.98769600 | -2.55646500 | 1.58710100  |
| F | -2.85002600 | 1.35783800  | -1.99073800 |
| F | -2.77056900 | 5.55597500  | 0.08297800  |
| F | -1.31065800 | 4.52463100  | 2.13179700  |
| F | -0.61787300 | 1.95213400  | 2.13793700  |
| F | -1.37284100 | -2.60835000 | -1.26333800 |
| F | -4.05995200 | 0.47689900  | 1.10620500  |
| F | -3.49192500 | -4.23348600 | -1.53259700 |
| F | -5.89407300 | -3.52210400 | -0.46833000 |
| F | -6.14311100 | -1.15827700 | 0.85491600  |
| F | -3.53431300 | 3.95063800  | -1.98128100 |
| H | 2.72942900  | -2.92554900 | -2.67674700 |
| H | -0.39143600 | -0.45847300 | -1.56521200 |
| H | -0.96231600 | 0.06176800  | -1.61980800 |
| C | 5.62686600  | -1.35827900 | -0.33002800 |
| C | 6.35411400  | -0.71263400 | 0.86359700  |
| C | 5.94725200  | -0.39722000 | -1.46555300 |
| C | 6.51179300  | 0.76565000  | 0.44217500  |
| O | 5.90000400  | 0.89186300  | -0.84577900 |
| H | 5.95854100  | -2.37920100 | -0.53188900 |

|   |            |             |             |
|---|------------|-------------|-------------|
| H | 4.54265100 | -1.36731500 | -0.18328700 |
| H | 7.33533000 | -1.17040500 | 1.01379200  |
| H | 5.79101900 | -0.81330000 | 1.79296800  |
| H | 5.20556400 | -0.41411400 | -2.26510300 |
| H | 6.95565700 | -0.57194000 | -1.86972700 |
| H | 7.56883600 | 1.05030200  | 0.36929100  |
| H | 6.00820500 | 1.46314300  | 1.11694500  |

Int1

|   |             |             |             |
|---|-------------|-------------|-------------|
| C | 1.64922500  | -2.22372600 | -1.64740500 |
| O | 2.40046900  | -3.07659800 | -0.96073700 |
| O | 2.07737700  | -1.15981000 | -2.03512700 |
| K | 1.73070900  | 1.46930700  | -2.30993000 |
| O | 0.41751800  | -2.68111700 | -1.84751100 |
| B | -0.73198200 | -0.00739400 | -0.21710100 |
| C | 0.25993500  | -0.85946100 | 0.76366400  |
| C | -2.22223700 | -0.63869600 | -0.42439500 |
| C | -0.89780800 | 1.54990200  | 0.27093800  |
| C | -0.02029700 | -2.04505600 | 1.43474600  |
| C | 0.90194400  | -2.71535900 | 2.23353500  |
| C | 2.17924100  | -2.20245100 | 2.39000400  |
| C | 2.51430400  | -1.02605600 | 1.73619700  |
| C | 1.56306100  | -0.40393500 | 0.94512800  |
| C | -0.77051400 | 2.02194300  | 1.57449400  |
| C | -0.94285600 | 3.35448100  | 1.92921200  |
| C | -1.26429200 | 4.28826700  | 0.95633800  |
| C | -1.40624900 | 3.87148900  | -0.35811300 |
| C | -1.22322600 | 2.52942600  | -0.66285300 |
| C | -3.17508400 | -0.63925100 | 0.58994000  |
| C | -4.47124300 | -1.10383900 | 0.43279200  |
| C | -4.86763300 | -1.60371800 | -0.80118600 |
| C | -3.95824400 | -1.63001500 | -1.84531200 |
| C | -2.67120200 | -1.14949900 | -1.63316100 |
| F | 1.95938300  | 0.73458400  | 0.32841000  |
| F | 3.74227300  | -0.51237700 | 1.87072900  |
| F | 3.07450300  | -2.83196400 | 3.15339700  |
| F | 0.56610600  | -3.85355500 | 2.85089400  |
| F | -1.23093500 | -2.62514000 | 1.34290600  |
| F | -1.36374200 | 2.19032600  | -1.96414600 |
| F | -1.43073700 | 5.57216900  | 1.28049000  |
| F | -0.80100300 | 3.74621900  | 3.19998900  |
| F | -0.45935500 | 1.18696200  | 2.58192600  |
| F | -1.83994000 | -1.21266600 | -2.70515700 |
| F | -2.83794900 | -0.18021600 | 1.80838000  |
| F | -4.32450600 | -2.11116800 | -3.03801300 |
| F | -6.11160300 | -2.05396900 | -0.97663900 |
| F | -5.34145200 | -1.08070300 | 1.44763800  |
| F | -1.71156300 | 4.75917900  | -1.31087700 |
| H | 1.89544200  | -3.87267600 | -0.73223000 |
| H | -0.12267600 | -1.99289200 | -2.27704400 |
| H | -0.19977700 | 0.01461000  | -1.30582600 |
| C | 5.39192000  | -0.68072400 | -1.04898500 |
| C | 5.92099200  | 0.49005600  | -0.21393900 |
| C | 4.98076700  | 0.03755800  | -2.32380400 |
| C | 4.98833000  | 1.64116500  | -0.61982600 |
| O | 4.37236300  | 1.25055100  | -1.86253700 |
| H | 6.13721200  | -1.46107200 | -1.21836400 |
| H | 4.50512600  | -1.12690600 | -0.58430100 |
| H | 6.95319700  | 0.71548800  | -0.49919300 |
| H | 5.89537400  | 0.30117700  | 0.86037600  |
| H | 4.24141200  | -0.50296500 | -2.91760900 |



|      |             |             |             |
|------|-------------|-------------|-------------|
| H    | 5.85482700  | 0.27604100  | -2.94599400 |
| H    | 5.52534600  | 2.58341500  | -0.76834100 |
| H    | 4.19082300  | 1.79759200  | 0.11258500  |
| Int2 |             |             |             |
| C    | -3.43955500 | 1.71094200  | -2.07467100 |
| O    | -4.28811200 | 1.99891300  | -3.05286000 |
| O    | -2.72872900 | 0.73213200  | -2.10381300 |
| K    | -1.54756300 | -1.55447200 | -2.65108600 |
| O    | -3.48199400 | 2.59614600  | -1.08414800 |
| B    | 0.66359900  | 0.15400200  | -0.16592400 |
| C    | 2.03691700  | -0.60742800 | -0.60979900 |
| C    | 0.09725300  | -0.63774500 | 1.15509600  |
| C    | 0.81978500  | 1.76834300  | 0.04312300  |
| C    | 3.12816000  | -0.69805000 | 0.24922300  |
| C    | 4.29540600  | -1.38062500 | -0.05337000 |
| C    | 4.40216200  | -2.02865000 | -1.27759400 |
| C    | 3.34171100  | -1.97718700 | -2.16678900 |
| C    | 2.19339600  | -1.27699000 | -1.81318200 |
| C    | 1.94783400  | 2.54387500  | -0.20461600 |
| C    | 1.98686800  | 3.92692200  | -0.04781600 |
| C    | 0.85597000  | 4.60678800  | 0.37033000  |
| C    | -0.30106900 | 3.88426800  | 0.62385200  |
| C    | -0.28275900 | 2.51111200  | 0.45116700  |
| C    | 0.02576600  | -0.17811200 | 2.46525900  |
| C    | -0.47161400 | -0.93525400 | 3.52105700  |
| C    | -0.90961100 | -2.22951600 | 3.29270600  |
| C    | -0.84182500 | -2.74580500 | 2.00669100  |
| C    | -0.34975500 | -1.94460600 | 0.98802200  |
| F    | 1.19861400  | -1.28168000 | -2.73286600 |
| F    | 3.42940300  | -2.60187400 | -3.34700800 |
| F    | 5.51726700  | -2.69226600 | -1.59187600 |
| F    | 5.31774400  | -1.42259600 | 0.80812500  |
| F    | 3.07819500  | -0.07451800 | 1.44100900  |
| F    | -1.45169500 | 1.86818300  | 0.72595300  |
| F    | 0.87466300  | 5.93238400  | 0.52175200  |
| F    | 3.10994700  | 4.60560000  | -0.30526700 |
| F    | 3.09806700  | 1.98628000  | -0.62750800 |
| F    | -0.32332600 | -2.50134900 | -0.24964700 |
| F    | 0.44908000  | 1.05803700  | 2.78763900  |
| F    | -1.25220800 | -3.99756200 | 1.76703000  |
| F    | -1.38268600 | -2.97339200 | 4.29466800  |
| F    | -0.52069600 | -0.42871300 | 4.75767200  |
| F    | -1.41355000 | 4.51258000  | 1.02188200  |
| H    | -4.77231000 | 2.81700100  | -2.86058100 |
| H    | -0.16503000 | 0.01069100  | -1.03872100 |
| H    | -2.84812800 | 2.32638400  | -0.39399900 |
| C    | -4.97141600 | -0.58684700 | -0.10014900 |
| C    | -3.74130800 | -1.19787000 | 0.59757800  |
| C    | -5.02587300 | -1.32644200 | -1.45848100 |
| C    | -3.63428700 | -2.54449500 | -0.10837600 |
| O    | -3.91074000 | -2.22755500 | -1.47236500 |
| H    | -5.87881300 | -0.78535200 | 0.47553600  |
| H    | -4.88697800 | 0.49602700  | -0.21572400 |
| H    | -3.86243200 | -1.28888000 | 1.67977800  |
| H    | -2.84250300 | -0.60288600 | 0.39445100  |
| H    | -4.92545200 | -0.66900900 | -2.32437000 |
| H    | -5.95197500 | -1.90535400 | -1.55637700 |
| H    | -4.38420400 | -3.25341300 | 0.27186000  |
| H    | -2.65219400 | -3.01914000 | -0.06572100 |

K<sub>2</sub>H<sub>2</sub>PO<sub>4</sub>-BCF-Solvent (M062x/6-311++G\*\*)

Reactant

|   |             |             |             |
|---|-------------|-------------|-------------|
| C | -1.29927100 | 3.93841500  | -1.51960200 |
| C | -1.01464200 | 2.79160000  | -0.79718200 |
| F | -4.24814200 | 2.05773100  | 0.60757800  |
| F | -4.81397400 | 4.29172600  | -0.74180100 |
| F | -2.87947000 | 5.55428300  | -2.17106500 |
| F | -0.35226200 | 4.55672700  | -2.22306700 |
| C | -0.24520000 | 0.71192400  | 1.51045100  |
| F | -1.95301300 | -0.98079500 | 3.06230100  |
| F | -3.66938800 | -3.00701500 | 3.20385000  |
| F | -5.33888700 | -3.54037500 | 1.12818400  |
| F | -5.26835000 | -1.99789000 | -1.10819100 |
| C | 0.33984700  | 1.82305500  | 2.12487200  |
| C | 1.52449700  | 1.75687100  | 2.84266600  |
| C | 2.18580300  | 0.53995600  | 2.95126700  |
| C | 1.65234600  | -0.58282900 | 2.33869600  |
| H | -0.96854800 | -0.40141200 | -1.38032300 |
| C | 0.46326400  | -0.48208100 | 1.63986400  |
| F | -0.25647300 | 3.02005900  | 2.06732700  |
| F | 2.02849200  | 2.84086300  | 3.43281500  |
| F | 3.31537200  | 0.45208000  | 3.64335300  |
| C | -3.62936800 | -2.25494300 | 2.10563900  |
| C | -4.44935100 | -1.73596900 | -0.09079000 |
| F | 2.28586700  | -1.75782300 | 2.42368800  |
| C | -3.55175900 | -0.68200900 | -0.15469100 |
| C | -2.65949000 | -0.37067400 | 0.87731300  |
| C | -4.48611100 | -2.52869500 | 1.04871800  |
| C | -2.74107300 | -1.19547000 | 2.00379800  |
| F | 0.00097900  | -1.61201000 | 1.09191300  |
| B | -1.61953100 | 0.80027400  | 0.75716100  |
| F | -3.54492500 | 0.02446900  | -1.29060800 |
| F | 0.25091100  | 2.34988500  | -0.84668900 |
| C | -1.97249600 | 2.09535800  | -0.05734100 |
| C | -3.25770200 | 2.64078100  | -0.07723300 |
| C | -3.57700900 | 3.79902400  | -0.76882700 |
| C | -2.59068100 | 4.44802000  | -1.49848800 |
| H | -0.23264100 | -0.32546100 | -1.26282000 |
| P | 2.64954200  | -0.95622000 | -2.21091500 |
| O | 2.04709800  | -0.59919100 | -0.83116900 |
| O | 3.61595300  | 0.11172700  | -2.73534100 |
| O | 1.31233300  | -0.89542100 | -3.21669400 |
| O | 3.16930800  | -2.39733200 | -2.27645500 |
| K | 3.06255000  | 1.93617100  | -0.96008400 |
| H | 1.58900300  | -1.05407800 | -4.12814600 |
| K | 2.16905400  | -3.19337000 | 0.00437300  |
| C | -1.53672200 | -3.56897800 | -0.92760800 |
| O | -0.15469100 | -3.86118600 | -1.18138200 |
| C | 0.07797600  | -3.94605400 | -2.60049100 |
| C | -1.06887400 | -3.17144600 | -3.23137900 |
| C | -2.22816900 | -3.52177100 | -2.29361000 |
| H | -1.94870800 | -4.33837200 | -0.26554200 |
| H | -1.58499000 | -2.59998000 | -0.41678800 |
| H | 1.06183800  | -3.51133200 | -2.80139300 |
| H | 0.06183900  | -5.00259500 | -2.90177200 |
| H | -0.83788400 | -2.10266600 | -3.19429800 |
| H | -1.25272400 | -3.46321100 | -4.26817800 |
| H | -3.04074700 | -2.79105800 | -2.32530500 |
| H | -2.64295500 | -4.50274200 | -2.54695700 |
| C | 5.42742300  | 0.98281300  | 1.31433100  |
| O | 5.58965400  | 1.50623100  | -0.00135000 |
| C | 6.17356100  | 0.45897700  | -0.79656100 |
| C | 5.74787200  | -0.87511500 | -0.14488900 |
| C | 4.92189500  | -0.43668300 | 1.08043100  |

|   |            |             |             |
|---|------------|-------------|-------------|
| H | 6.39350000 | 0.98042200  | 1.84120800  |
| H | 4.73693400 | 1.63809400  | 1.85323800  |
| H | 5.77895600 | 0.56517900  | -1.80843800 |
| H | 7.26375200 | 0.58058100  | -0.79483200 |
| H | 5.15011100 | -1.47813100 | -0.83398300 |
| H | 6.62441800 | -1.45369500 | 0.15926100  |
| H | 3.85901900 | -0.41607700 | 0.80846300  |
| H | 5.05661300 | -1.08507400 | 1.94973100  |

TS1

|   |             |             |             |
|---|-------------|-------------|-------------|
| C | -1.03487800 | 4.06310800  | -1.36854500 |
| C | -0.77320000 | 2.84905800  | -0.75797300 |
| F | -4.01513900 | 2.03635000  | 0.57574100  |
| F | -4.54651600 | 4.37499900  | -0.57043700 |
| F | -2.59870100 | 5.74806700  | -1.87942200 |
| F | -0.07371000 | 4.73424500  | -2.00250500 |
| C | -0.05808800 | 0.60657200  | 1.48882600  |
| F | -1.89073100 | -0.92646100 | 3.01121300  |
| F | -3.84941900 | -2.69998500 | 3.26208000  |
| F | -5.58018100 | -3.14829500 | 1.21400100  |
| F | -5.31388500 | -1.76564000 | -1.11543500 |
| C | 0.52840000  | 1.68913100  | 2.14067800  |
| C | 1.66984600  | 1.57410300  | 2.92631400  |
| C | 2.27910100  | 0.33561200  | 3.06871000  |
| C | 1.72852400  | -0.76865500 | 2.43467700  |
| H | -0.86353200 | -0.02730000 | -0.97331400 |
| C | 0.58570300  | -0.61415000 | 1.67416200  |
| F | -0.00691100 | 2.91419900  | 2.05267400  |
| F | 2.18201100  | 2.64135000  | 3.54087400  |
| F | 3.37266000  | 0.20474800  | 3.81319900  |
| C | -3.71420700 | -2.03327200 | 2.11624300  |
| C | -4.46214000 | -1.55457500 | -0.11132800 |
| F | 2.30965400  | -1.96938300 | 2.54124500  |
| C | -3.42820400 | -0.64131500 | -0.23526600 |
| C | -2.50633300 | -0.37763700 | 0.77986100  |
| C | -4.60071000 | -2.26253700 | 1.07518300  |
| C | -2.69425000 | -1.10436500 | 1.95496300  |
| F | 0.09425600  | -1.72414200 | 1.10126600  |
| B | -1.35866300 | 0.70494100  | 0.58778500  |
| F | -3.32458400 | 0.00057700  | -1.40726000 |
| F | 0.48654700  | 2.39039900  | -0.83317100 |
| C | -1.73291100 | 2.09403500  | -0.08736800 |
| C | -3.00761800 | 2.65677900  | -0.05219000 |
| C | -3.31171300 | 3.87787600  | -0.63978900 |
| C | -2.32090600 | 4.58272300  | -1.30598200 |
| H | -0.10253200 | -0.12228500 | -0.86294200 |
| P | 2.25588600  | -0.71812800 | -2.34033200 |
| O | 1.81105900  | -0.48233200 | -0.87088300 |

|   |             |             |             |
|---|-------------|-------------|-------------|
| O | 3.20282400  | 0.37139500  | -2.84793600 |
| O | 0.81262300  | -0.53128600 | -3.16059300 |
| O | 2.72132500  | -2.15518000 | -2.59159100 |
| K | 3.15830500  | 1.92727300  | -0.77803000 |
| H | 0.93742800  | -0.70466800 | -4.10226800 |
| K | 2.11369300  | -3.15292100 | -0.24880900 |
| C | -1.62058200 | -3.75968400 | -0.84065500 |
| O | -0.25906500 | -3.86601000 | -1.28729700 |
| C | -0.20670400 | -3.76443300 | -2.72461100 |
| C | -1.50257700 | -3.06891100 | -3.10991400 |
| C | -2.47705800 | -3.69089600 | -2.10674500 |
| H | -1.85660400 | -4.61930000 | -0.20593400 |
| H | -1.70959300 | -2.84360200 | -0.24236800 |
| H | 0.69757700  | -3.20789000 | -2.98424200 |
| H | -0.16108100 | -4.77621800 | -3.15131500 |
| H | -1.40017700 | -1.99041100 | -2.94410600 |
| H | -1.78229000 | -3.24377300 | -4.15134200 |
| H | -3.39188900 | -3.11098500 | -1.96748600 |
| H | -2.76076100 | -4.69780500 | -2.43016200 |
| C | 5.50025900  | 0.37539700  | 1.21476400  |
| O | 5.62851400  | 1.06760200  | -0.02444100 |
| C | 6.00205500  | 0.09361700  | -1.01562300 |
| C | 5.49332800  | -1.27199200 | -0.50228000 |
| C | 4.80093700  | -0.92339400 | 0.82924000  |
| H | 6.49384900  | 0.18091200  | 1.64460900  |
| H | 4.93920100  | 1.01593100  | 1.90089200  |
| H | 5.52514000  | 0.38677300  | -1.95404700 |
| H | 7.09228100  | 0.10281600  | -1.13031500 |
| H | 4.80307400  | -1.72842300 | -1.21743200 |
| H | 6.32883600  | -1.95719700 | -0.33548900 |
| H | 3.73643600  | -0.72372600 | 0.64879400  |
| H | 4.89881900  | -1.70423100 | 1.58771800  |

**Int1**

|   |             |             |             |
|---|-------------|-------------|-------------|
| C | -2.76375200 | -3.12449500 | 0.31119800  |
| C | -1.91252300 | -2.03257900 | 0.32148000  |
| F | 1.26411000  | -3.65350400 | -0.10268000 |
| F | -0.33459200 | -5.75586600 | -0.11156800 |
| F | -3.03563800 | -5.46664200 | 0.14880000  |
| F | -4.09049500 | -2.95130300 | 0.42119300  |
| C | 0.02648400  | 0.29191800  | 1.36830600  |
| F | 2.07746700  | -1.56532000 | 2.38973700  |
| F | 4.73827200  | -1.87339600 | 2.34245700  |
| F | 6.11679500  | -1.54371700 | 0.01090600  |
| F | 4.77462700  | -0.88682400 | -2.26698600 |
| C | -0.45657400 | -0.05963800 | 2.62589800  |
| C | -0.71980300 | 0.85773000  | 3.63683100  |
| C | -0.48639800 | 2.20698800  | 3.41604900  |
| C | 0.00946300  | 2.61085200  | 2.18606900  |
| H | 0.06135700  | -0.15773200 | -0.88520200 |

|             |             |             |             |
|-------------|-------------|-------------|-------------|
| C           | 0.24329400  | 1.65638000  | 1.20491100  |
| F           | -0.70359300 | -1.34633700 | 2.92942700  |
| F           | -1.19118800 | 0.45388000  | 4.82138800  |
| F           | -0.73322800 | 3.10419700  | 4.37290300  |
| C           | 4.08737900  | -1.53536400 | 1.22395400  |
| C           | 4.10588500  | -1.03620900 | -1.11654100 |
| F           | 0.24194800  | 3.90851500  | 1.95511200  |
| C           | 2.73105700  | -0.84688000 | -1.06099500 |
| C           | 1.97750800  | -0.99328800 | 0.09514600  |
| C           | 4.79283700  | -1.37194500 | 0.03907600  |
| C           | 2.71286800  | -1.35074800 | 1.22241800  |
| F           | 0.72409600  | 2.12771100  | 0.03525000  |
| B           | 0.36634000  | -0.73590300 | 0.13703000  |
| F           | 2.13889800  | -0.52303200 | -2.23192700 |
| F           | -2.51464700 | -0.82851000 | 0.46654000  |
| C           | -0.52753900 | -2.10803600 | 0.19045400  |
| C           | -0.05127300 | -3.40806600 | 0.04287900  |
| C           | -0.86548000 | -4.53735100 | 0.03289900  |
| C           | -2.23655100 | -4.39852700 | 0.16532000  |
| H           | -2.34336100 | 1.70837100  | -1.06296200 |
| P           | -2.17304600 | 0.77380100  | -3.02135200 |
| O           | -1.66038100 | 1.68785800  | -1.77140000 |
| O           | -3.62473400 | 1.04776100  | -3.30290800 |
| O           | -2.19243100 | -0.74298800 | -2.37933100 |
| O           | -1.08680900 | 0.88537900  | -4.05283900 |
| K           | -4.77560900 | -0.48412100 | -1.39147400 |
| H           | -1.31711900 | -1.00920700 | -2.05553900 |
| K           | 0.96084500  | 1.91741600  | -2.62057500 |
| C           | 3.68135700  | 2.30520800  | 0.07321900  |
| O           | 3.34582800  | 2.15388300  | -1.31760700 |
| C           | 4.52397700  | 2.30199500  | -2.12595500 |
| C           | 5.70027700  | 2.11436100  | -1.17525800 |
| C           | 5.14920400  | 2.72897800  | 0.11399400  |
| H           | 3.00953000  | 3.04362700  | 0.51804000  |
| H           | 3.52186800  | 1.33963700  | 0.57172300  |
| H           | 4.48068000  | 1.55867300  | -2.92659100 |
| H           | 4.53271800  | 3.30692400  | -2.56817500 |
| H           | 5.91400600  | 1.04990200  | -1.03488100 |
| H           | 6.60839600  | 2.60251400  | -1.53485700 |
| H           | 5.65501000  | 2.37384400  | 1.01437300  |
| H           | 5.23267200  | 3.81984700  | 0.07707500  |
| C           | -3.41640900 | 1.98119700  | 1.26363800  |
| O           | -3.81389400 | 1.77425000  | -0.10504500 |
| C           | -4.48943300 | 2.96534100  | -0.58469500 |
| C           | -4.33010700 | 4.02232700  | 0.51745600  |
| C           | -3.16306700 | 3.47717300  | 1.34771200  |
| H           | -4.23118400 | 1.67256100  | 1.93086300  |
| H           | -2.54285200 | 1.35156200  | 1.44433300  |
| H           | -4.00609400 | 3.25003300  | -1.52342100 |
| H           | -5.53624400 | 2.71995800  | -0.78609400 |
| H           | -4.13811500 | 5.01417600  | 0.10483200  |
| H           | -5.23375500 | 4.07395400  | 1.13143400  |
| H           | -2.20677000 | 3.71955400  | 0.86990900  |
| H           | -3.14843100 | 3.84994600  | 2.37448800  |
| <b>Int2</b> |             |             |             |
| O           | -0.41416000 | 2.64649400  | -1.23502800 |
| K           | -1.68975300 | 0.94889200  | -2.66300600 |
| B           | -0.05794400 | -1.34262100 | -0.30813200 |
| C           | -1.21996700 | -2.48745700 | -0.25530500 |
| C           | -0.37100100 | -0.33376500 | 0.95143500  |
| C           | 1.46620900  | -1.93435600 | -0.35399300 |
| C           | -1.31597600 | -3.36251000 | 0.82177900  |
| C           | -2.31698500 | -4.30983400 | 0.96332900  |

|   |             |             |             |
|---|-------------|-------------|-------------|
| C | -3.30215200 | -4.40094600 | -0.01149000 |
| C | -3.26198600 | -3.54339700 | -1.09909400 |
| C | -2.23272400 | -2.61265800 | -1.19400900 |
| C | 1.85188400  | -3.26093000 | -0.51883800 |
| C | 3.17818700  | -3.67752100 | -0.60339000 |
| C | 4.19966700  | -2.74684100 | -0.52682900 |
| C | 3.87147600  | -1.40768900 | -0.37386700 |
| C | 2.53670600  | -1.04621500 | -0.30709300 |
| C | 0.38436200  | -0.10652400 | 2.09338000  |
| C | 0.00666100  | 0.75347000  | 3.11697000  |
| C | -1.19765900 | 1.42875700  | 3.03946400  |
| C | -2.00262100 | 1.23108000  | 1.92914500  |
| C | -1.56655900 | 0.37969500  | 0.92676000  |
| F | -2.27155100 | -1.80078900 | -2.27664700 |
| F | -4.21244700 | -3.61658700 | -2.03875500 |
| F | -4.28026900 | -5.30330500 | 0.10152300  |
| F | -2.34888200 | -5.13364600 | 2.01747400  |
| F | -0.38237900 | -3.31388100 | 1.79113600  |
| F | 2.29115900  | 0.27651300  | -0.16594800 |
| F | 5.47682700  | -3.12812700 | -0.60508600 |
| F | 3.47376200  | -4.97288500 | -0.76143900 |
| F | 0.93952300  | -4.24673200 | -0.62008700 |
| F | -2.39971100 | 0.24438100  | -0.13164500 |
| F | 1.58553400  | -0.70866500 | 2.27058500  |
| F | -3.18122900 | 1.85431400  | 1.83899800  |
| F | -1.57134200 | 2.26998400  | 4.00832900  |
| F | 0.82213700  | 0.95704700  | 4.16341800  |
| F | 4.83820900  | -0.48457700 | -0.28149200 |
| H | -0.18777300 | -0.69396600 | -1.32350000 |
| C | -4.55168100 | 3.98169700  | -0.54919100 |
| C | -5.74827300 | 3.04484200  | -0.73349600 |
| C | -3.71537500 | 3.65667100  | -1.78047400 |
| C | -5.07782700 | 1.79355100  | -1.29616800 |
| O | -3.93845800 | 2.25816300  | -2.03917700 |
| H | -4.82972700 | 5.03721400  | -0.50291700 |
| H | -3.98913400 | 3.72242900  | 0.35208200  |
| H | -6.45218900 | 3.46252600  | -1.46101600 |
| H | -6.28788500 | 2.84084100  | 0.19401400  |
| H | -2.64316800 | 3.80373100  | -1.62335400 |
| H | -4.04643200 | 4.23310800  | -2.65431500 |
| H | -5.72064500 | 1.22060400  | -1.97034700 |
| H | -4.72564500 | 1.13663900  | -0.49259600 |
| K | 3.08461400  | 1.92137600  | 1.84047900  |
| C | 5.46556000  | 1.75332700  | -2.33499800 |
| C | 3.94668800  | 1.70056400  | -2.59320400 |
| C | 3.40871600  | 2.73474600  | -1.61027200 |
| C | 5.58160600  | 2.40156700  | -0.93745400 |
| H | 5.91608200  | 0.75933400  | -2.35966100 |
| H | 5.96864900  | 2.37059500  | -3.08336400 |
| H | 3.54393700  | 0.71386600  | -2.34641200 |
| H | 3.68468000  | 1.93046800  | -3.62833200 |
| H | 3.50763400  | 3.75364600  | -2.01383000 |
| H | 2.37631800  | 2.57035500  | -1.29456900 |
| H | 6.08500600  | 3.37508500  | -0.99333100 |
| H | 6.10207600  | 1.77546800  | -0.20935300 |
| O | 4.24579100  | 2.59214000  | -0.46293800 |
| P | -0.02500300 | 3.48274600  | -0.04680700 |
| O | 0.93249000  | 2.99332300  | 1.00235800  |
| O | 0.59042500  | 4.90285200  | -0.57831700 |
| O | -1.43017300 | 3.92763900  | 0.65909400  |
| H | -1.28083200 | 4.34294600  | 1.51982100  |
| H | 0.13845600  | 5.20371100  | -1.37806900 |

KH<sub>3</sub>PO<sub>4</sub>-BCF-Solvent (M062x/6-311++G\*\*)

## Reactant

|   |             |             |             |
|---|-------------|-------------|-------------|
| C | 0.31253400  | 3.62287800  | 0.10785100  |
| C | 0.44358400  | 2.24583600  | 0.05969200  |
| F | 3.81635500  | 1.93547700  | -1.15604400 |
| F | 3.57883100  | 4.59020800  | -1.09953100 |
| F | 1.26586100  | 5.74360400  | -0.25511900 |
| F | -0.82997700 | 4.17950500  | 0.51862200  |
| C | 0.47204200  | -0.82453900 | -0.78874400 |
| F | 2.71787300  | -2.40699300 | -1.65116400 |
| F | 5.03503200  | -3.59372900 | -1.09638200 |
| F | 6.69631300  | -2.54966400 | 0.78362300  |
| F | 6.00386800  | -0.27558500 | 2.10180500  |
| C | -0.46670300 | -0.39449500 | -1.73226200 |
| C | -1.56263700 | -1.14797800 | -2.10601800 |
| C | -1.78112000 | -2.37414400 | -1.49589500 |
| C | -0.88886900 | -2.84099000 | -0.54535000 |
| H | 1.42516500  | 0.13331100  | 2.27740200  |
| C | 0.21549200  | -2.07333200 | -0.21595300 |
| F | -0.32058300 | 0.79313600  | -2.34145500 |
| F | -2.43048300 | -0.69005500 | -3.01343900 |
| F | -2.85908300 | -3.08608900 | -1.80465600 |
| C | 4.69425200  | -2.47944900 | -0.45004900 |
| C | 5.18995800  | -0.78600900 | 1.17832100  |
| F | -1.11522000 | -4.00765600 | 0.06096000  |
| C | 3.98911900  | -0.16720300 | 0.86976100  |
| C | 3.09025900  | -0.66830400 | -0.07640900 |
| C | 5.54551500  | -1.94894600 | 0.50885000  |
| C | 3.49221000  | -1.84327000 | -0.71771200 |
| F | 1.05133100  | -2.58082600 | 0.69324000  |
| B | 1.71912000  | 0.03016300  | -0.39519900 |
| F | 3.70428200  | 0.95332800  | 1.54507500  |
| F | -0.62414200 | 1.53610100  | 0.45241700  |
| C | 1.60880000  | 1.59934500  | -0.35608800 |
| C | 2.65421800  | 2.44512000  | -0.73346000 |
| C | 2.55630500  | 3.82864300  | -0.71374000 |
| C | 1.37661700  | 4.42195500  | -0.28602600 |
| H | 0.76742300  | -0.21300000 | 2.20840100  |
| P | -2.47461700 | -0.83900900 | 1.96285200  |
| O | -1.14776400 | -1.43801100 | 2.32238400  |
| O | -2.92526700 | -0.58917500 | 0.55240400  |
| O | -2.62018700 | 0.64259500  | 2.68018700  |
| H | -2.12151200 | 0.70165300  | 3.50567800  |
| K | -3.39900600 | 2.00790000  | 0.40375300  |
| C | -6.08189100 | -0.06169900 | 0.95807600  |
| O | -5.88619100 | 1.00579800  | 0.01482700  |
| C | -6.16721700 | 0.48313600  | -1.28402300 |
| C | -5.58581000 | -0.92356100 | -1.24861300 |
| C | -5.95152300 | -1.38207000 | 0.17295500  |
| H | -5.31798500 | 0.03777500  | 1.73341900  |
| H | -7.07270700 | 0.04641400  | 1.41546200  |
| H | -7.25469300 | 0.46375100  | -1.44968400 |
| H | -5.70804300 | 1.14836700  | -2.01977500 |
| H | -5.99324000 | -1.57171500 | -2.02830100 |
| H | -4.49839300 | -0.87328800 | -1.34804400 |
| H | -6.90137500 | -1.92459600 | 0.17554600  |
| H | -5.17683200 | -2.01608400 | 0.60665400  |
| O | -3.65627200 | -1.70710100 | 2.69021100  |
| H | -3.30070200 | -2.21359800 | 3.43250700  |

## TS1

|   |            |            |             |
|---|------------|------------|-------------|
| C | 0.33851400 | 3.70468600 | -0.00141000 |
|---|------------|------------|-------------|

|   |             |             |             |
|---|-------------|-------------|-------------|
| C | 0.41974300  | 2.33014700  | 0.12791000  |
| F | 3.75666500  | 1.72638600  | -1.07544200 |
| F | 3.62770600  | 4.36725700  | -1.34203600 |
| F | 1.37365900  | 5.72214700  | -0.64028800 |
| F | -0.77861700 | 4.35454800  | 0.33732000  |
| C | 0.34178700  | -0.84954800 | -0.61108700 |
| F | 2.60117000  | -2.29594200 | -1.61539700 |
| F | 4.99972800  | -3.40367200 | -1.29917800 |
| F | 6.71104700  | -2.47652100 | 0.59936700  |
| F | 5.97950900  | -0.38429800 | 2.18082100  |
| C | -0.52966400 | -0.41145700 | -1.60373700 |
| C | -1.56369800 | -1.18995700 | -2.10148000 |
| C | -1.77749500 | -2.45326800 | -1.57972500 |
| C | -0.94247900 | -2.93161400 | -0.58005700 |
| H | 1.37592300  | 0.12381200  | 1.66729000  |
| C | 0.09295500  | -2.13479100 | -0.12727600 |
| F | -0.40119900 | 0.81213000  | -2.14426100 |
| F | -2.37212800 | -0.71372800 | -3.05460300 |
| F | -2.78432100 | -3.20214800 | -2.02391500 |
| C | 4.63979600  | -2.38474800 | -0.51731900 |
| C | 5.14149300  | -0.84526800 | 1.25162900  |
| F | -1.14903500 | -4.14705200 | -0.06510200 |
| C | 3.89469400  | -0.27153300 | 1.06716800  |
| C | 2.97072100  | -0.71864100 | 0.12404400  |
| C | 5.51686200  | -1.91244700 | 0.44683600  |
| C | 3.39204800  | -1.79082600 | -0.65907800 |
| F | 0.88812300  | -2.64851300 | 0.82061600  |
| B | 1.55689500  | -0.00174300 | -0.04816900 |
| F | 3.57757300  | 0.76808500  | 1.85638800  |
| F | -0.66609900 | 1.70287700  | 0.61053800  |
| C | 1.54626700  | 1.58474900  | -0.21216500 |
| C | 2.61759300  | 2.32612300  | -0.70481000 |
| C | 2.57583300  | 3.70748800  | -0.85707300 |
| C | 1.42978400  | 4.40175600  | -0.50188000 |
| H | 0.68331600  | -0.21365000 | 1.68240800  |
| P | -2.34606700 | -0.60635800 | 1.98534900  |
| O | -0.93229000 | -0.91853300 | 2.39639300  |
| O | -2.78251600 | -0.44889100 | 0.56037900  |
| O | -2.80554700 | 0.81032500  | 2.69627600  |
| H | -2.34612500 | 0.96875100  | 3.53157900  |
| K | -3.47450300 | 2.08723600  | 0.32035600  |
| C | -5.96665200 | -0.22185900 | 1.02492500  |
| O | -5.86831800 | 0.85914500  | 0.08239100  |
| C | -6.13200400 | 0.31920700  | -1.21262700 |



|   |             |             |             |
|---|-------------|-------------|-------------|
| C | -5.44138800 | -1.03835700 | -1.19393700 |
| C | -5.73368600 | -1.52574800 | 0.23484300  |
| H | -5.20918500 | -0.05706200 | 1.79537300  |
| H | -6.96061400 | -0.19829500 | 1.48829500  |
| H | -7.21744200 | 0.21516300  | -1.35874600 |
| H | -5.74003400 | 1.01966300  | -1.95452000 |
| H | -5.81567200 | -1.71566000 | -1.96527600 |
| H | -4.36397800 | -0.90246700 | -1.32136800 |
| H | -6.62996300 | -2.15214500 | 0.25728700  |
| H | -4.89559100 | -2.08778200 | 0.64981300  |
| O | -3.33636000 | -1.70592300 | 2.67401900  |
| H | -2.91848400 | -2.12127800 | 3.44039800  |

### Int1

|   |             |             |             |
|---|-------------|-------------|-------------|
| C | 0.57931600  | 3.91007700  | 0.41637700  |
| C | 0.53896500  | 2.53190900  | 0.53629700  |
| F | 3.98754500  | 1.68916100  | -0.00545200 |
| F | 4.10404800  | 4.31827600  | -0.24105000 |
| F | 1.86766800  | 5.85309000  | 0.02754000  |
| F | -0.53185000 | 4.64658600  | 0.54871400  |
| C | 0.24344500  | -0.56747600 | -0.33192800 |
| F | 2.82506400  | -0.17126900 | -1.91773100 |
| F | 4.92214400  | -1.77281700 | -2.45475800 |
| F | 5.99891200  | -3.31580500 | -0.48286300 |
| F | 4.94821600  | -3.22870600 | 2.02846900  |
| C | -0.31817400 | -0.02447000 | -1.48296500 |
| C | -1.27399900 | -0.67559400 | -2.25278600 |
| C | -1.70691100 | -1.94082100 | -1.88690200 |
| C | -1.18057200 | -2.52971600 | -0.74885300 |
| H | 1.12242600  | -0.06636300 | 1.77504300  |
| C | -0.23100700 | -1.83695700 | -0.01178400 |
| F | 0.05080200  | 1.19507200  | -1.92431000 |
| F | -1.77572200 | -0.09875000 | -3.35358200 |
| F | -2.61235300 | -2.58417600 | -2.62827300 |
| C | 4.40556700  | -1.73514500 | -1.22069800 |
| C | 4.42341500  | -2.46993000 | 1.05856300  |
| F | -1.59271400 | -3.74425900 | -0.37569800 |
| C | 3.34010900  | -1.63483700 | 1.31472900  |
| C | 2.75346700  | -0.83081100 | 0.34721900  |
| C | 4.95950000  | -2.52000200 | -0.21764800 |
| C | 3.32532900  | -0.92258100 | -0.91758700 |
| F | 0.23862600  | -2.45880700 | 1.09081200  |
| B | 1.42876700  | 0.08093300  | 0.60451000  |
| F | 2.87304900  | -1.64392100 | 2.57674900  |
| F | -0.67760600 | 1.99047900  | 0.78913600  |
| C | 1.63642300  | 1.68771600  | 0.39446100  |
| C | 2.82800100  | 2.35691700  | 0.13749600  |
| C | 2.92444200  | 3.74031900  | 0.01093100  |
| C | 1.79344400  | 4.52593800  | 0.14842100  |
| H | -0.38827400 | -0.17700200 | 2.23957400  |
| P | -2.56444200 | -0.56729800 | 2.14781000  |
| O | -1.16780200 | -0.26243700 | 2.83247300  |
| O | -2.90928900 | 0.15441800  | 0.90740400  |
| O | -3.59881200 | -0.23212400 | 3.31249700  |
| H | -3.39293000 | -0.60526900 | 4.18267900  |
| K | -3.19859300 | 2.24871500  | -0.54916300 |
| C | -5.93415400 | 0.25252200  | 0.22455300  |
| O | -5.24539100 | 0.55806600  | -0.99593100 |
| C | -5.11529600 | -0.64627300 | -1.75186900 |

|   |             |             |             |
|---|-------------|-------------|-------------|
| C | -4.91468000 | -1.74179100 | -0.71113300 |
| C | -5.81960700 | -1.27024000 | 0.43836700  |
| H | -5.45265000 | 0.82193800  | 1.02472600  |
| H | -6.97901900 | 0.57219100  | 0.13646000  |
| H | -6.03043400 | -0.81705700 | -2.33739200 |
| H | -4.27457200 | -0.51926300 | -2.43915300 |
| H | -5.18586200 | -2.73001100 | -1.08941600 |
| H | -3.87309900 | -1.75750300 | -0.38271800 |
| H | -6.80527000 | -1.73920600 | 0.37582000  |
| H | -5.39433200 | -1.51040600 | 1.41612100  |
| O | -2.61743000 | -2.14625800 | 1.90599200  |
| H | -2.11474700 | -2.68608300 | 2.53427400  |

## Int2

|   |             |             |             |
|---|-------------|-------------|-------------|
| O | -2.43389900 | 1.26646700  | -1.32281100 |
| K | -1.77515200 | -0.86102200 | -2.65584900 |
| B | 1.06050300  | -0.14704100 | -0.35519100 |
| C | 1.54297000  | -1.69817200 | -0.20948800 |
| C | 0.10737100  | 0.16174000  | 0.94515000  |
| C | 2.26235500  | 0.94166200  | -0.55113500 |
| C | 2.26899000  | -2.13219000 | 0.89579100  |
| C | 2.64261600  | -3.44950000 | 1.10769900  |
| C | 2.27454300  | -4.41414900 | 0.17863100  |
| C | 1.54326700  | -4.03764700 | -0.93611000 |
| C | 1.19544500  | -2.70149600 | -1.10048000 |
| C | 3.62311300  | 0.68409300  | -0.67612600 |
| C | 4.57949100  | 1.67190400  | -0.89389000 |
| C | 4.18995000  | 2.99556400  | -1.00220900 |
| C | 2.84264200  | 3.30996500  | -0.89202900 |
| C | 1.93363800  | 2.28789300  | -0.67711800 |
| C | 0.41364300  | 0.93397100  | 2.06172300  |
| C | -0.45427200 | 1.11378200  | 3.13582600  |
| C | -1.69218700 | 0.49311600  | 3.12702400  |
| C | -2.03853400 | -0.30647900 | 2.04721200  |
| C | -1.14196600 | -0.44930200 | 1.00100200  |
| F | 0.47317800  | -2.41667000 | -2.21078500 |
| F | 1.17641500  | -4.95906000 | -1.83445900 |
| F | 2.62091800  | -5.69101500 | 0.35818900  |
| F | 3.34870700  | -3.80417400 | 2.18713800  |
| F | 2.65526400  | -1.23309800 | 1.81982000  |
| F | 0.63236100  | 2.66591700  | -0.58063000 |
| F | 5.09341100  | 3.95501700  | -1.21605700 |
| F | 5.87277900  | 1.35115100  | -1.01018100 |
| F | 4.10474000  | -0.57144400 | -0.59934700 |
| F | -1.52537000 | -1.27339300 | 0.00008300  |
| F | 1.60067600  | 1.56224800  | 2.16100700  |
| F | -3.22155600 | -0.93121600 | 2.03314000  |
| F | -2.53909400 | 0.65379800  | 4.14585700  |
| F | -0.10246100 | 1.87787000  | 4.17555400  |
| F | 2.44234300  | 4.58134200  | -1.00158800 |
| H | 0.35931600  | -0.04477100 | -1.33776700 |
| C | -5.50692000 | -0.30639400 | -0.32410100 |
| C | -5.62401500 | -1.78211700 | 0.06668200  |
| C | -5.15112800 | -0.42245400 | -1.79761800 |
| C | -4.51097000 | -2.43110200 | -0.76372800 |
| O | -4.25286600 | -1.53880500 | -1.86594000 |
| H | -6.42273600 | 0.26349300  | -0.15139400 |
| H | -4.68302900 | 0.17562700  | 0.21160600  |
| H | -6.60234800 | -2.17237000 | -0.23136800 |
| H | -5.49336900 | -1.95910200 | 1.13599100  |
| H | -4.62947500 | 0.45263100  | -2.19223000 |
| H | -6.04100200 | -0.62989900 | -2.40795900 |

|   |             |             |             |
|---|-------------|-------------|-------------|
| H | -4.79450100 | -3.41078500 | -1.16029100 |
| H | -3.58509100 | -2.53117700 | -0.18887400 |
| P | -2.61156400 | 2.57689700  | -0.66096000 |
| O | -2.13752700 | 3.83084400  | -1.53132800 |
| H | -2.19002300 | 3.68452700  | -2.48733400 |
| O | -4.13227600 | 2.81720700  | -0.26760700 |
| H | -4.32524200 | 3.67367600  | 0.14297700  |
| O | -1.86615500 | 2.82026900  | 0.71852400  |
| H | -0.90290600 | 2.68986700  | 0.66553000  |
| S |             |             |             |
